# Supplementary material for: Challenges of high-fidelity air quality modeling in urban environments – PALM sensitivity study during stable conditions
Source: Copernicus journal article supplement (doi:10.5194/egusphere-2024-1231), 2024-05-06
Supplement: Supplementary file 1 [file egusphere-2024-1231-supplement.pdf]

# Supplement materials for paper “Challenges of high-fidelity air quality modeling in urban environments - PALM sensitivity study during stable conditions”

## Content

[A. Synoptic situation](#)

[B. Comparison of the ICON, WRF, and ALADIN simulations with soundings in Praha 4-Libuš station](#)

[C. Comparison of the ICON, WRF, and ALADIN simulations with with LIDAR and Microwave observations](#)

[D. Comparison of the wind speed, wind direction, and potential temperature profiles modeled by mesoscale models with LIDAR and MW observations](#)

[E. Air quality sensor network](#)

[F. Calculation of the anthropogenic heat from cars.](#)

[G. Comparison of the PALM modeled concentrations of PM10 with values observed by sensor stations S14 and S15.](#)

[H. Comparison of the PALM modeled concentrations of PM2.5 with values observed by ALEGA AIM station.](#)

[I. Modeled and observed profiles of wind speed and wind direction.](#)

[J. Domain cross-sections](#)

# A. Synoptic situation

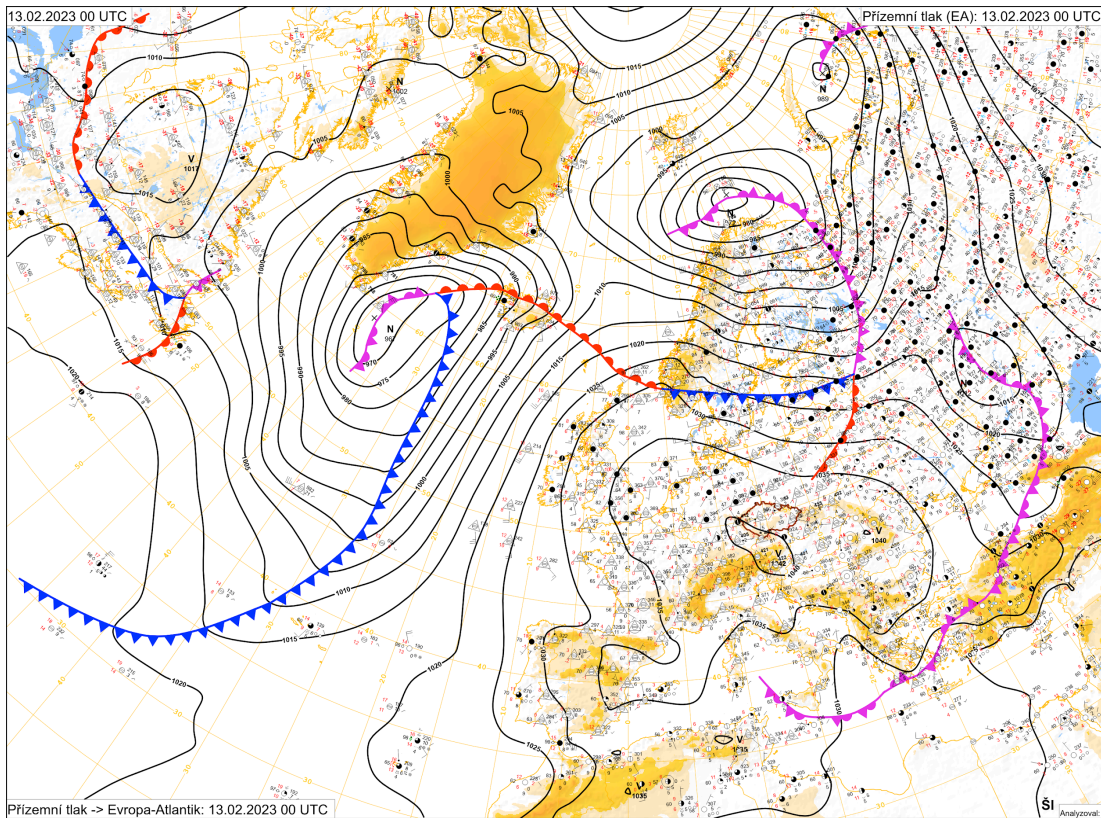

Figure S01: Surface pressure map and cloud cover over the Atlantic and Europe for 13 February 2023, 00 UTC. Data source CHMI.

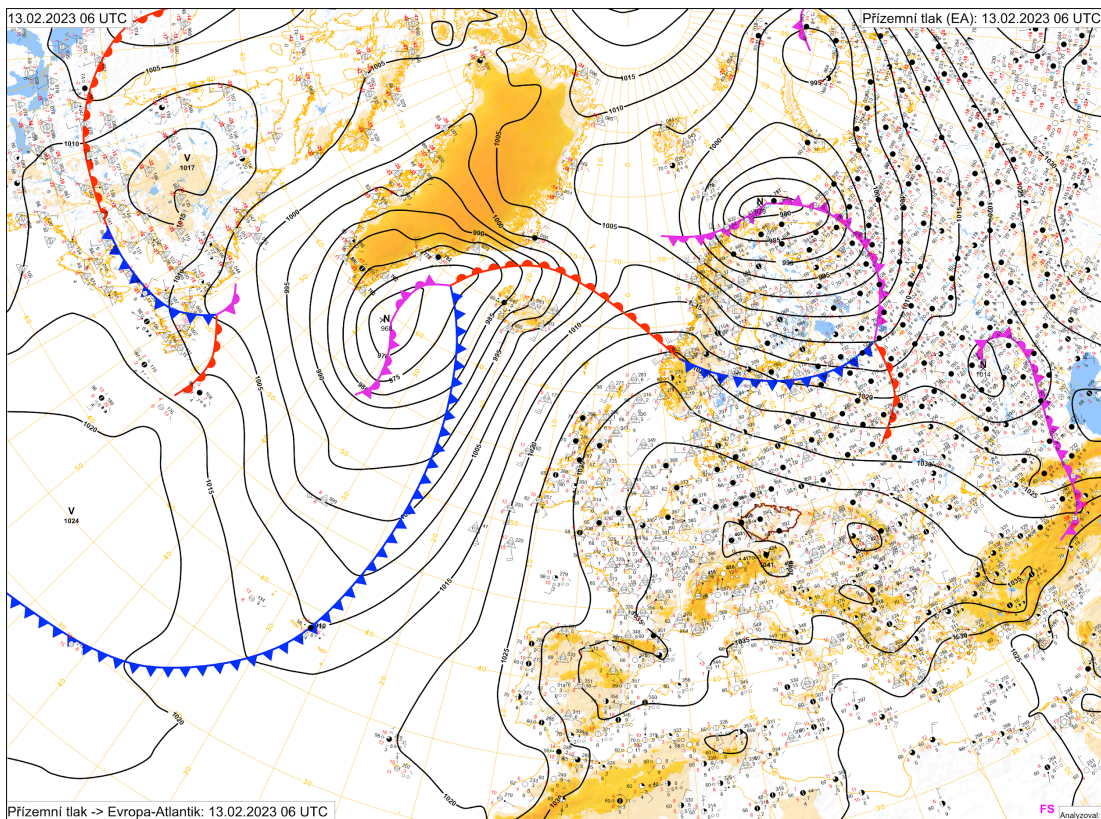

Figure S02: Surface pressure map and cloud cover over the Atlantic and Europe for 13 February 2023, 06 UTC. Data source CHMI.



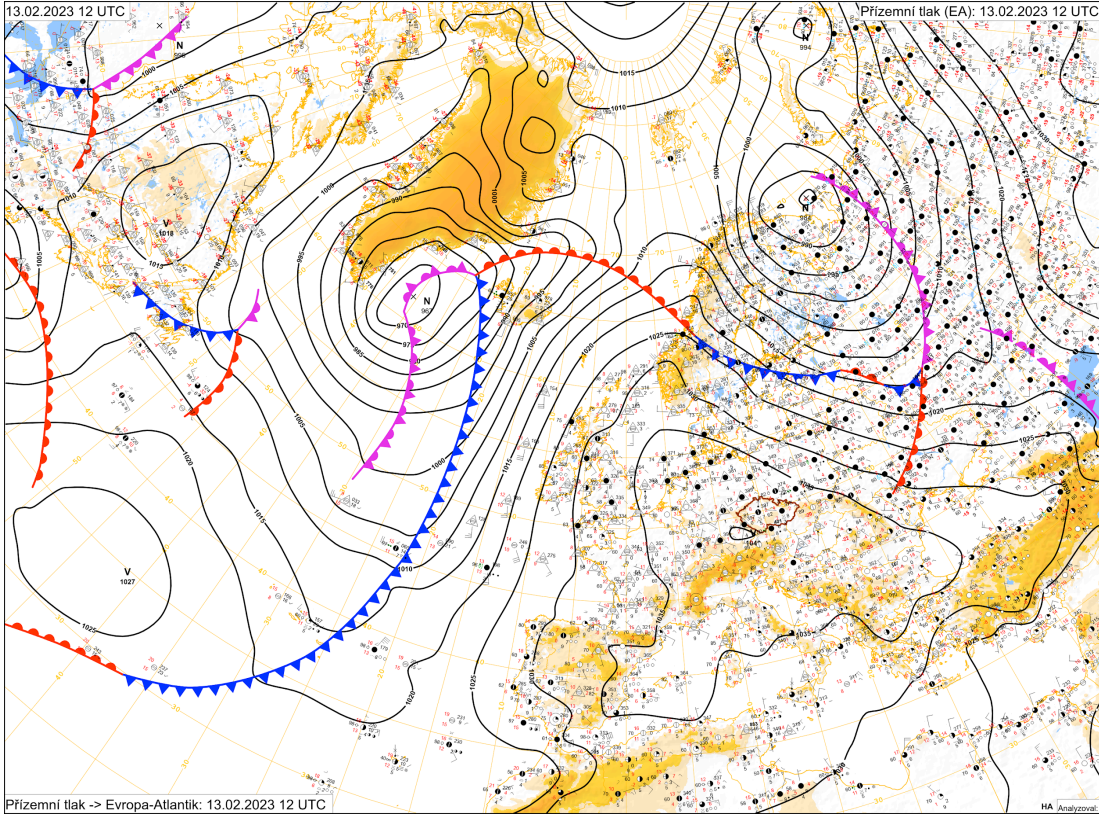

**Figure S03: Surface pressure map and cloud cover over the Atlantic and Europe for 13 February 2023, 12 UTC. Data source CHMI.**

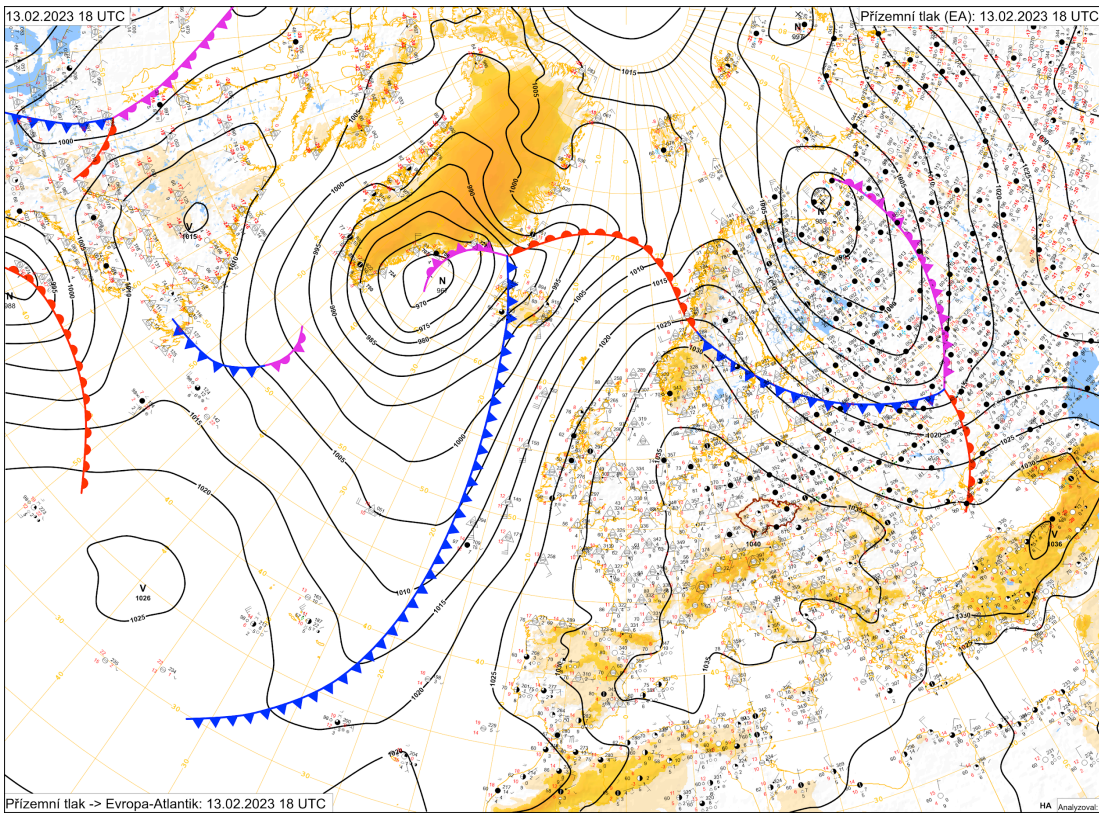

**Figure S04: Surface pressure map and cloud cover over the Atlantic and Europe for 13 February 2023, 18 UTC. Data source CHMI.**



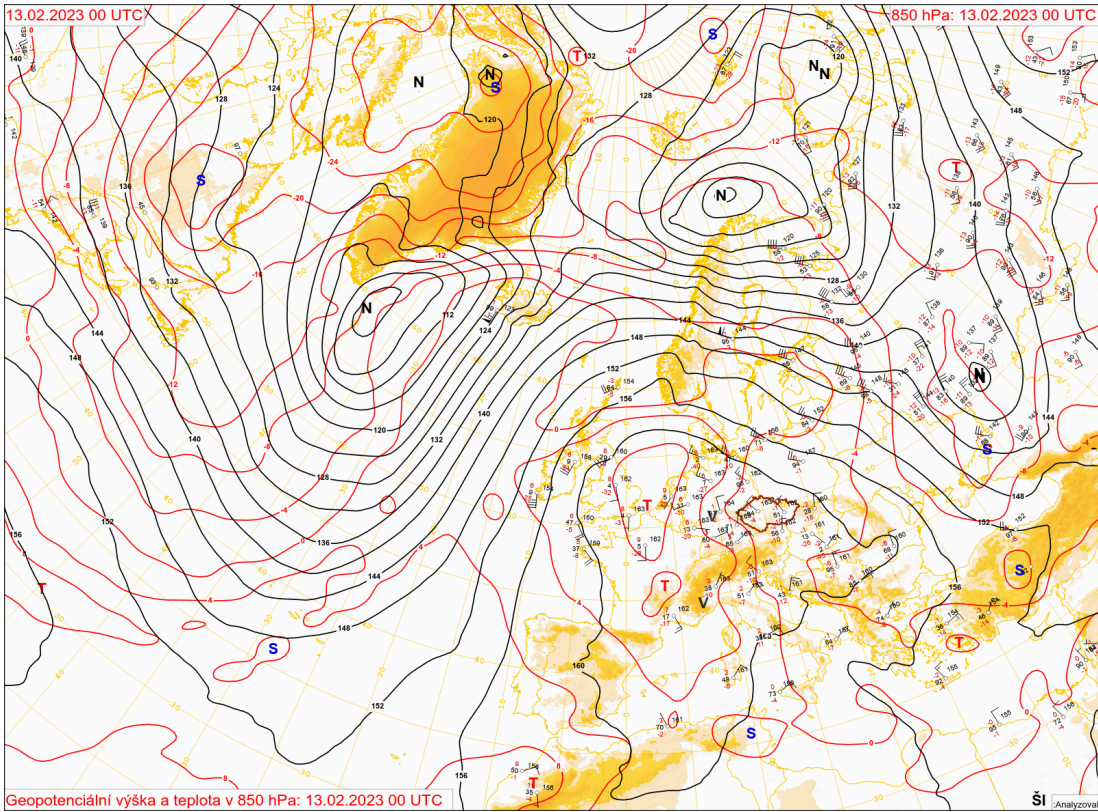

Figure S05: Geopotential height (black) and temperature (red) at 850 hPa for 13 February 2023, 00 UTC. N: cyclone, V: anticyclone. Data source CHMI.

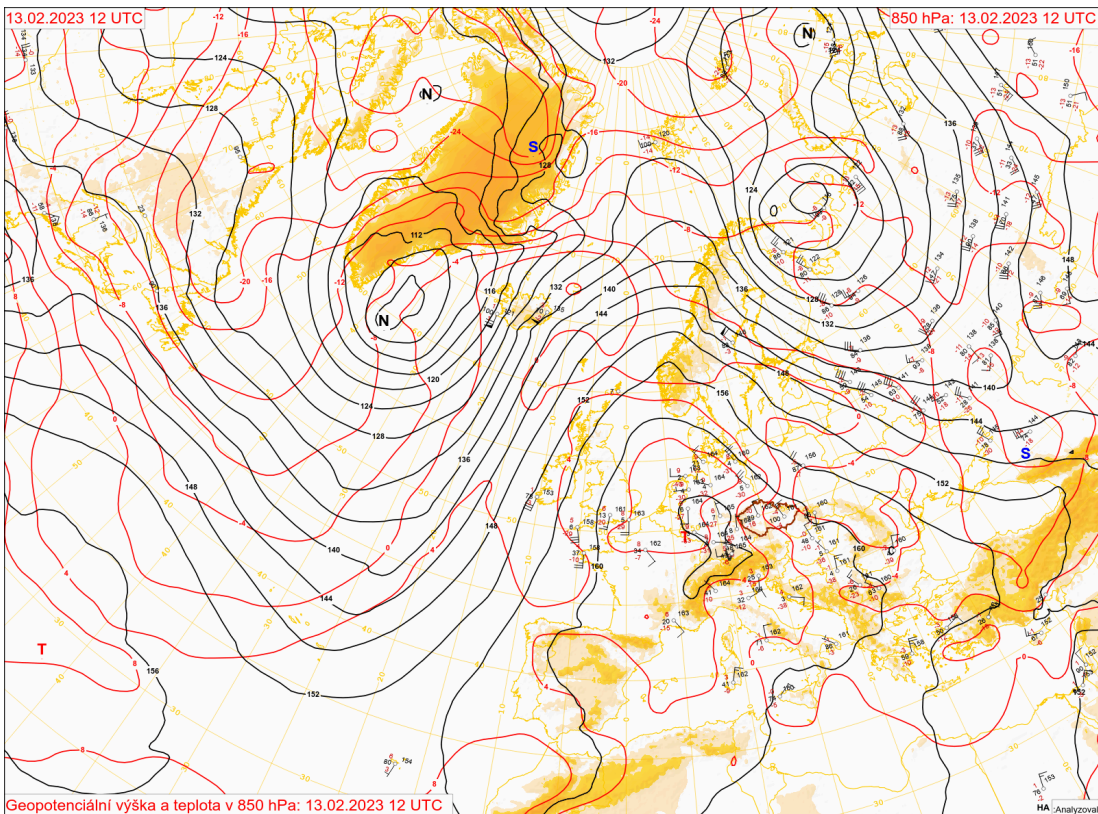

Figure S06: Geopotential height (black) and temperature (red) at 850 hPa for 13 February 2023, 12 UTC. N: cyclone, V: anticyclone. Data source CHMI.



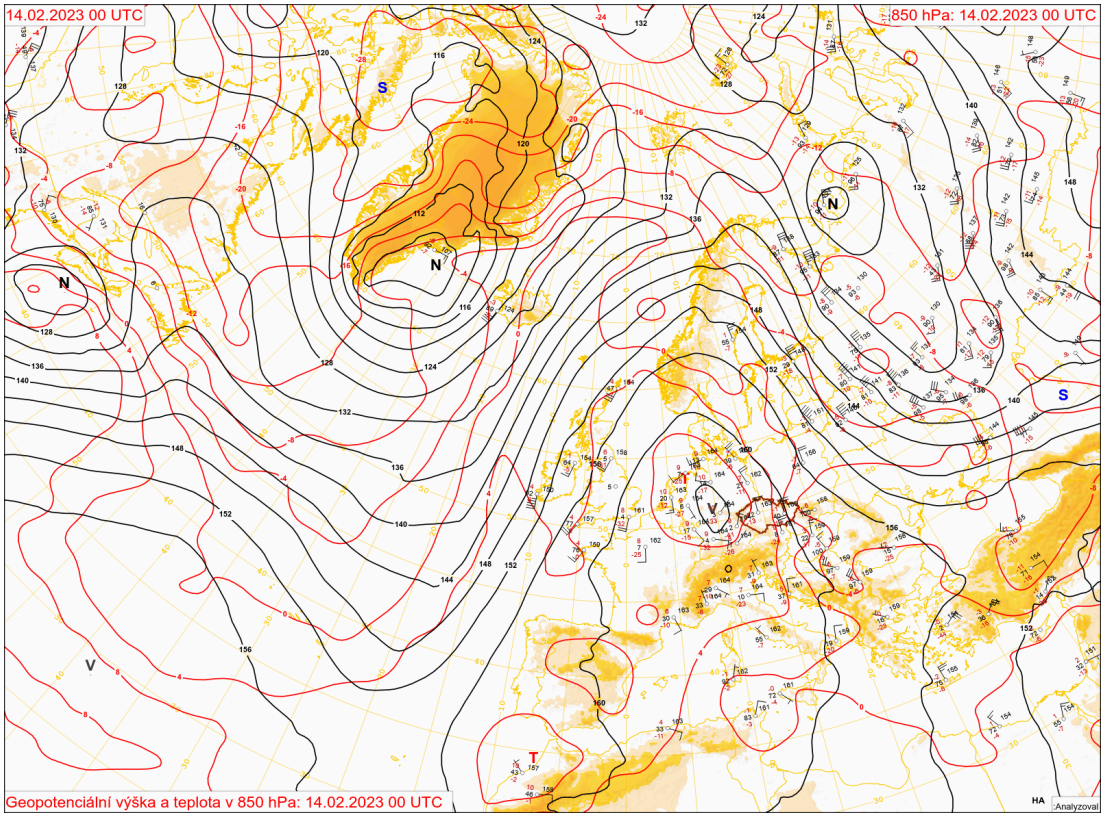

Figure S07: Geopotential height (black) and temperature (red) at 850 hPa for 14 February 2023, 00 UTC. N: cyclone, V: anticyclone. Data source CHMI.

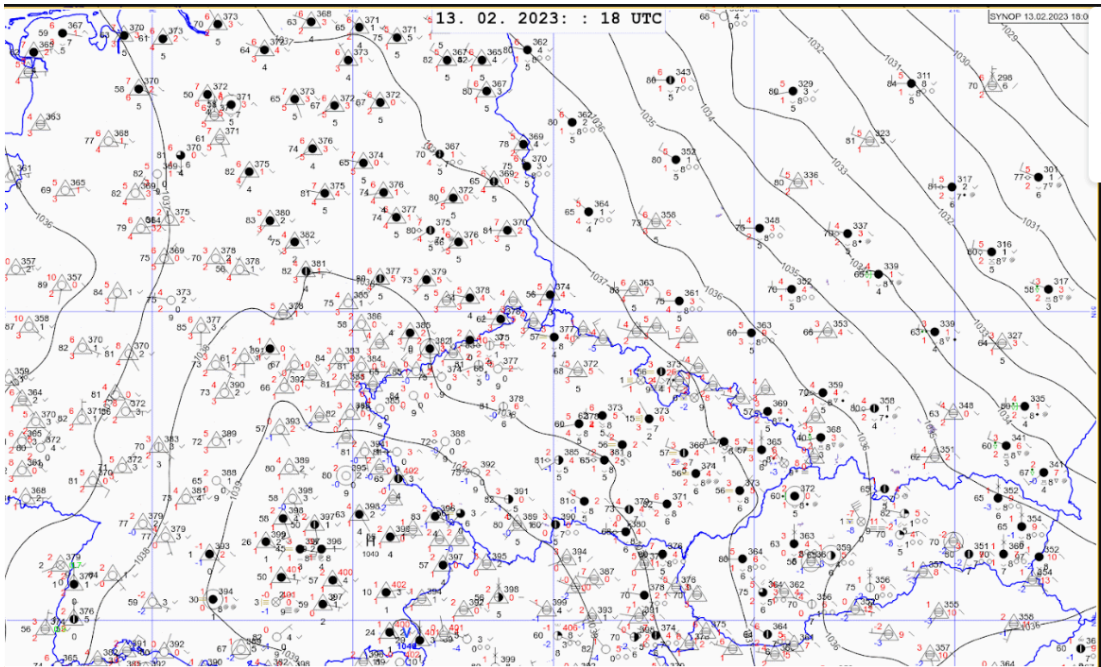

Figure S08: Surface weather analysis with isobars (black) for 13.2. 18:00 UTC 02. Data source CHMI.

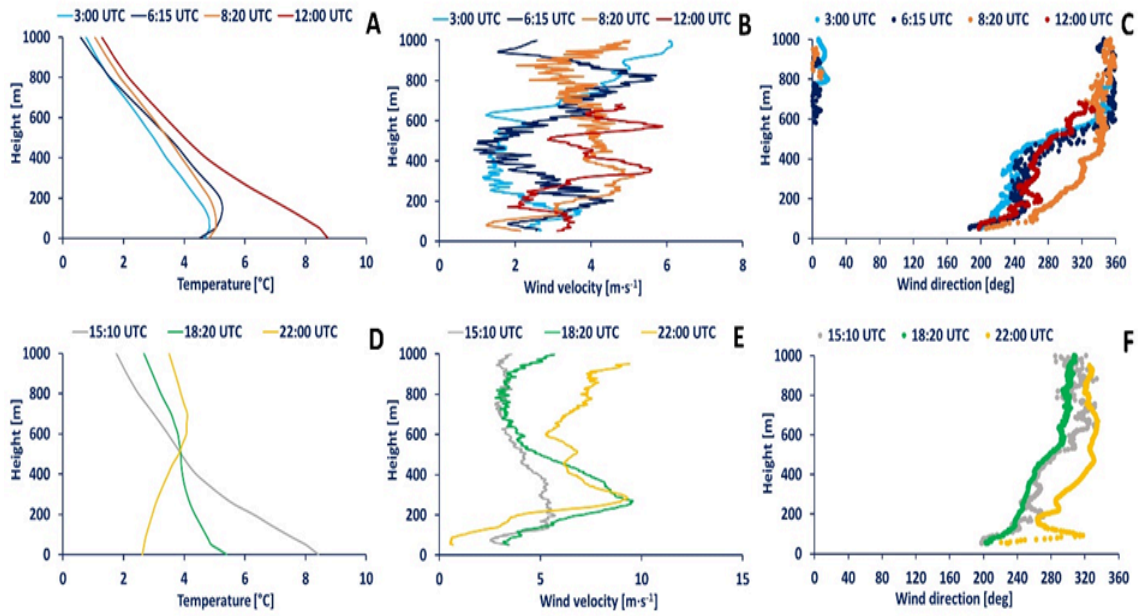

Figure S09: Temperature (A+D), wind velocity (B+E) and wind direction (C+F) profiles measured during 13 February 2023 in Prague TURBAN observation campaign. Change in temperature stratification within the lower boundary layer at selected morning and afternoon hours.

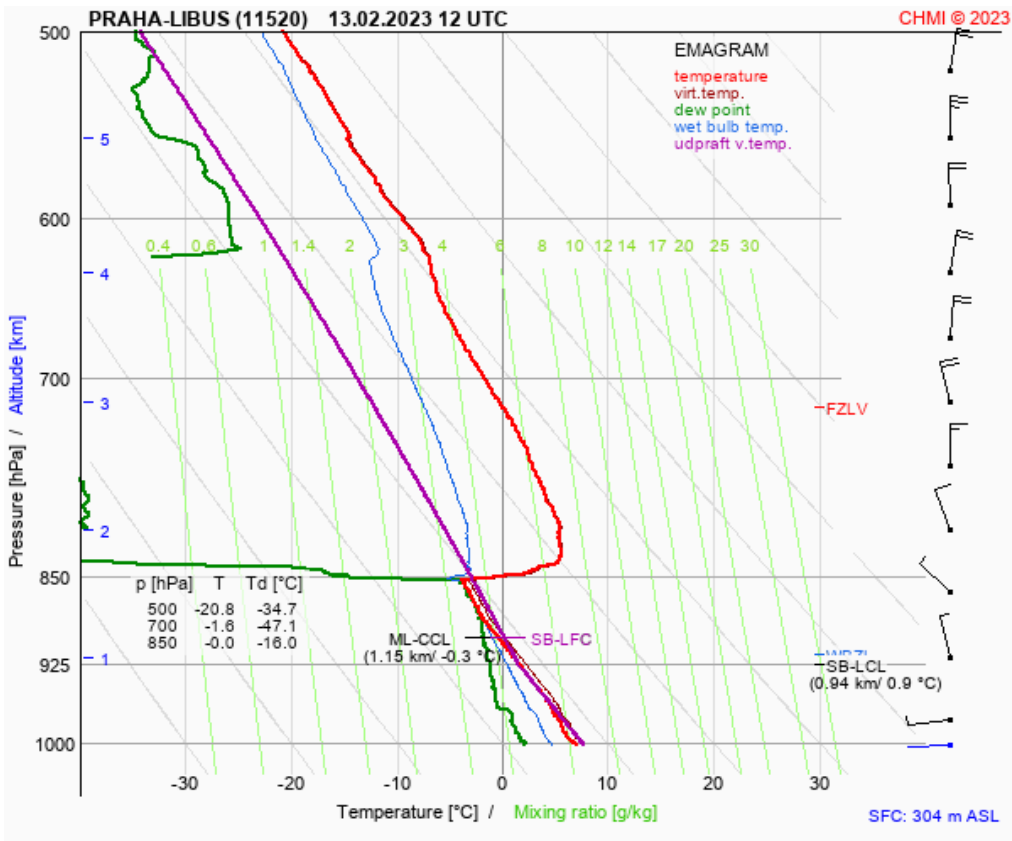



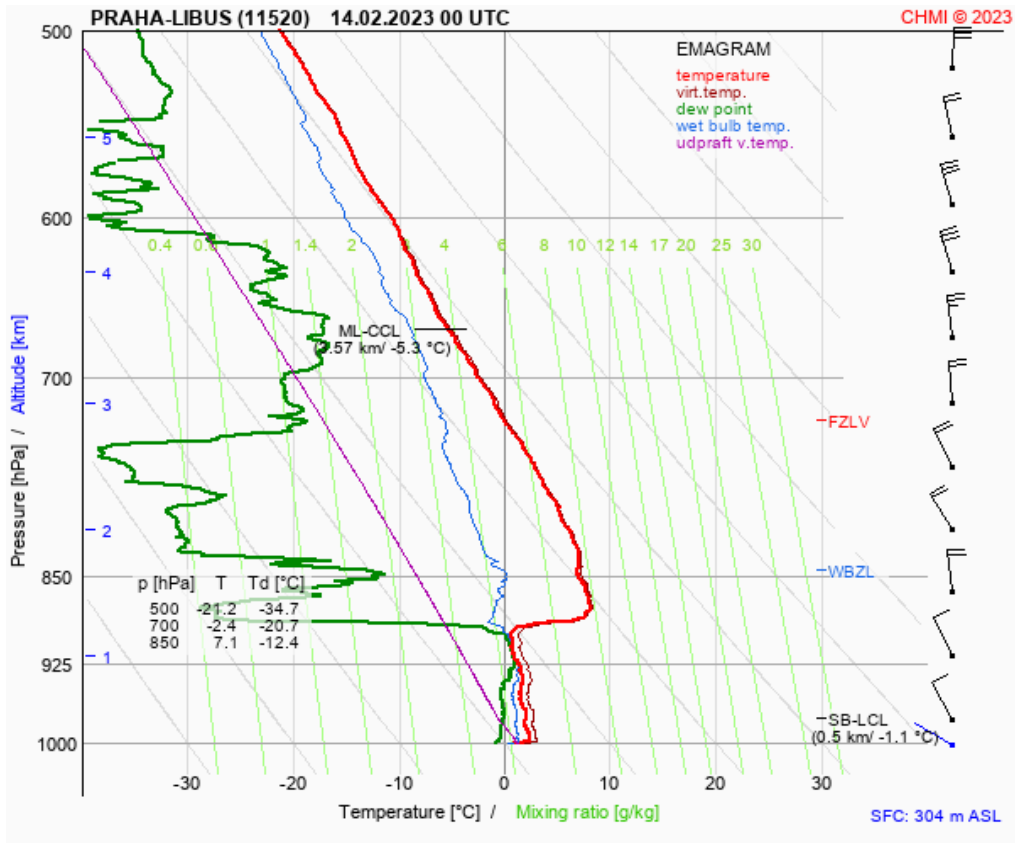

Figure S10: Emagrams from Praha 4-Libuš (WMO ID 11520) soundings for 13.2. (12h) and 14.2. (00h). Data source CHMI.

## B. Comparison of the ICON, WRF, and ALADIN simulations with soundings in Praha 4-Libuš station

A statistical analysis of the potential temperature, wind speed and direction vertical profiles up to the height of 3000 m a.s.l. and 600 m a.s.l. done for the mesoscale models (ICON, WRF, and ALADIN) against the radio soundings observation obtained from the Praha 4-Libuš station (WMO ID 11520): ens. size-ensemble size; mean obs-mean value observations; mean model-mean value from the mesoscale model; RMSE- root mean square error; MBE-mean bias error; r-correlation coefficient. The red color indicates the model with the worst, and the green color indicates the model with the best statistical metrics.

Table S01: Episode 1: 2022-07-17 00:00:00 - 2022-07-20 00:00:00

| WS [m/s]   | 3000 m a.s.l. |         |         | 600 m a.s.l. |         |        |
|------------|---------------|---------|---------|--------------|---------|--------|
|            | WRF           | ICON-D2 | ALADIN  | WRF          | ICON-D2 | ALADIN |
| ens. size  | 4702          | 4702    | 4702    | 528          | 528     | 528    |
| mean. obs. | 4.7651        | 4.7651  | 4.7651  | 2.9662       | 2.9662  | 2.9662 |
| mean mod.  | 4.5618        | 4.4265  | 4.6367  | 3.2905       | 2.2330  | 3.5765 |
| RMSE       | 1.5648        | 1.1938  | 1.5271  | 1.4701       | 1.4924  | 1.4908 |
| MBE        | -0.2033       | -0.3387 | -0.1285 | 0.3244       | -0.7332 | 0.6103 |
| r          | 0.8618        | 0.9273  | 0.8688  | 0.7753       | 0.8185  | 0.7813 |

| Theta [K]  | 3000 m a.s.l. |          |          | 600 m a.s.l. |          |          |
|------------|---------------|----------|----------|--------------|----------|----------|
|            | WRF           | ICON-D2  | ALADIN   | WRF          | ICON-D2  | ALADIN   |
| ens. size  | 4702          | 4702     | 4702     | 528          | 528      | 528      |
| mean. obs. | 299.6530      | 299.6530 | 299.6530 | 295.3264     | 295.3264 | 295.3264 |
| mean mod.  | 299.0824      | 299.6557 | 299.5104 | 294.8280     | 295.4102 | 295.8410 |
| RMSE       | 1.0860        | 0.4824   | 0.5852   | 1.5479       | 0.8641   | 1.4350   |
| MBE        | -0.5706       | 0.0026   | -0.1426  | -0.4984      | 0.0838   | 0.5147   |
| r          | 0.9843        | 0.9954   | 0.9936   | 0.9553       | 0.9847   | 0.9627   |

| WDir [deg] | 3000 m a.s.l. |          |          | 600 m a.s.l. |          |          |
|------------|---------------|----------|----------|--------------|----------|----------|
|            | WRF           | ICON-D2  | ALADIN   | WRF          | ICON-D2  | ALADIN   |
| ens. size  | 4702          | 4702     | 4702     | 528          | 528      | 528      |
| mean. obs. | 254.0503      | 254.0503 | 254.0503 | 206.5741     | 206.5741 | 206.5741 |
| mean mod.  | 272.3469      | 257.2193 | 243.2479 | 238.1008     | 210.4253 | 220.9560 |



|      |         |         |          |         |         |         |
|------|---------|---------|----------|---------|---------|---------|
| RMSE | 77.2417 | 72.6730 | 76.1917  | 78.9306 | 76.2414 | 79.3055 |
| MBE  | 18.2965 | 3.1689  | -10.8024 | 31.5266 | 3.8512  | 14.3819 |
| r    | 0.6846  | 0.7321  | 0.7208   | 0.6366  | 0.6135  | 0.5507  |

Table S02: Episode 2: 2022-08-02 00:00:00 - 2022-08-06 00:00:00

| WS [m/s]   | 3000 m a.s.l. |         |        | 600 m a.s.l. |         |        |
|------------|---------------|---------|--------|--------------|---------|--------|
|            | WRF           | ICON-D2 | ALADIN | WRF          | ICON-D2 | ALADIN |
| ens. size  | 6501          | 6501    | 6501   | 705          | 705     | 705    |
| mean. obs. | 4.0226        | 4.0226  | 4.0226 | 4.1031       | 4.1031  | 4.1031 |
| mean mod.  | 4.3123        | 3.8524  | 4.1102 | 4.6606       | 3.3987  | 4.6126 |
| RMSE       | 1.9221        | 1.1284  | 1.4996 | 1.9611       | 1.7292  | 1.9523 |
| MBE        | 0.2897        | -0.1701 | 0.0877 | 0.5575       | -0.7044 | 0.5095 |
| r          | 0.7614        | 0.8973  | 0.8081 | 0.8646       | 0.9285  | 0.8466 |

| Theta [K]  | 3000 m a.s.l. |          |          | 600 m a.s.l. |          |          |
|------------|---------------|----------|----------|--------------|----------|----------|
|            | WRF           | ICON-D2  | ALADIN   | WRF          | ICON-D2  | ALADIN   |
| ens. size  | 6501          | 6501     | 6501     | 705          | 705      | 705      |
| mean. obs. | 303.1334      | 303.1331 | 303.1331 | 299.4092     | 299.4092 | 299.4092 |
| mean mod.  | 302.8559      | 303.0261 | 303.0516 | 298.9366     | 299.2119 | 299.8093 |
| RMSE       | 1.1740        | 0.6446   | 0.5684   | 1.4205       | 1.1922   | 1.0722   |
| MBE        | -0.2772       | -0.1070  | -0.0815  | -0.4727      | -0.1974  | 0.4000   |
| r          | 0.9634        | 0.9865   | 0.9888   | 0.9455       | 0.9590   | 0.9686   |

| W.Dir. [deg] | 3000 m a.s.l. |          |          | 600 m a.s.l. |          |          |
|--------------|---------------|----------|----------|--------------|----------|----------|
|              | WRF           | ICON-D2  | ALADIN   | WRF          | ICON-D2  | ALADIN   |
| ens. size    | 6501          | 6501     | 6501     | 705          | 705      | 705      |
| mean. obs.   | 199.7091      | 199.7091 | 199.7091 | 184.3922     | 184.3922 | 184.3922 |
| mean mod.    | 206.9160      | 205.5264 | 196.2261 | 166.6572     | 201.6190 | 183.6304 |
| RMSE         | 99.8123       | 65.0311  | 79.3272  | 130.4314     | 79.4885  | 76.0843  |
| MBE          | 7.2069        | 5.8173   | -3.4830  | -17.7350     | 17.2268  | -0.7618  |

|   |        |        |        |         |        |        |
|---|--------|--------|--------|---------|--------|--------|
| r | 0.4050 | 0.7507 | 0.6418 | -0.2108 | 0.4464 | 0.5118 |
|---|--------|--------|--------|---------|--------|--------|

Table S03: Episode 3: 2022-09-22 00:00:00 - 2022-09-25 00:00:00

| WS [m/s]   | 3000 m a.s.l. |         |         | 600 m a.s.l. |         |        |
|------------|---------------|---------|---------|--------------|---------|--------|
|            | WRF           | ICON-D2 | ALADIN  | WRF          | ICON-D2 | ALADIN |
| ens. size  | 5050          | 5050    | 5050    | 583          | 583     | 583    |
| mean. obs. | 3.2452        | 3.2452  | 3.2452  | 2.6676       | 2.6676  | 2.6676 |
| mean mod.  | 3.2528        | 2.9664  | 3.1579  | 2.6968       | 2.1730  | 3.2669 |
| RMSE       | 1.4383        | 1.1314  | 1.3106  | 1.9721       | 1.5134  | 1.5881 |
| MBE        | 0.0076        | -0.2789 | -0.0873 | 0.0292       | -0.4947 | 0.5993 |
| r          | 0.6872        | 0.8042  | 0.7261  | 0.4873       | 0.5451  | 0.5945 |

| Theta [K]  | 3000 m a.s.l. |          |          | 600 m a.s.l. |          |          |
|------------|---------------|----------|----------|--------------|----------|----------|
|            | WRF           | ICON-D2  | ALADIN   | WRF          | ICON-D2  | ALADIN   |
| ens. size  | 5050          | 5050     | 5050     | 583          | 583      | 583      |
| mean. obs. | 290.9965      | 290.9965 | 290.9965 | 286.0544     | 286.0544 | 286.0544 |
| mean mod.  | 290.8566      | 290.9516 | 290.8174 | 285.5889     | 286.0260 | 286.4246 |
| RMSE       | 0.9740        | 0.5555   | 0.6354   | 1.0696       | 0.5652   | 0.9085   |
| MBE        | -0.1398       | -0.0449  | -0.1791  | -0.4655      | -0.0284  | 0.3702   |
| r          | 0.9764        | 0.9921   | 0.9903   | 0.9408       | 0.9808   | 0.9761   |

| W.Dir. [deg] | 3000 m a.s.l. |          |          | 600 m a.s.l. |          |          |
|--------------|---------------|----------|----------|--------------|----------|----------|
|              | WRF           | ICON-D2  | ALADIN   | WRF          | ICON-D2  | ALADIN   |
| ens. size    | 5050          | 5050     | 5050     | 583          | 583      | 583      |
| mean. obs.   | 239.2448      | 239.2448 | 239.2448 | 215.1145     | 215.1145 | 215.1145 |
| mean mod.    | 224.9361      | 232.2341 | 225.2463 | 223.6745     | 218.4773 | 201.3437 |
| RMSE         | 119.9099      | 100.5258 | 118.7961 | 63.1580      | 75.1142  | 115.4956 |
| MBE          | -14.3085      | -7.0107  | -13.9985 | 8.5600       | 3.3628   | -13.7708 |
| r            | 0.2857        | 0.4488   | 0.2838   | 0.6660       | 0.4747   | 0.0136   |



Table S04: Episode4: 2022-10-10 00:00:00 - 2022-10-15 00:00:00

| WS [m/s]   | 3000 m a.s.l. |         |         | 600 m a.s.l. |         |        |
|------------|---------------|---------|---------|--------------|---------|--------|
|            | WRF           | ICON-D2 | ALADIN  | WRF          | ICON-D2 | ALADIN |
| ens. size  | 7604          | 7604    | 7604    | 898          | 898     | 898    |
| mean. obs. | 5.9318        | 5.9318  | 5.9318  | 4.1234       | 4.1234  | 4.1234 |
| mean mod.  | 6.0487        | 5.7665  | 5.8493  | 4.9175       | 3.6723  | 4.7982 |
| RMSE       | 2.0561        | 1.2328  | 1.6524  | 2.7987       | 1.1319  | 1.6814 |
| MBE        | 0.1169        | -0.1653 | -0.0825 | 0.7942       | -0.4511 | 0.6748 |
| r          | 0.7355        | 0.9071  | 0.8226  | 0.6183       | 0.9070  | 0.7827 |

| Theta [K]  | 3000 m a.s.l. |          |          | 600 m a.s.l. |          |          |
|------------|---------------|----------|----------|--------------|----------|----------|
|            | WRF           | ICON-D2  | ALADIN   | WRF          | ICON-D2  | ALADIN   |
| ens. size  | 7604          | 7604     | 7604     | 898          | 898      | 898      |
| mean. obs. | 293.2012      | 293.2012 | 293.2012 | 286.4834     | 286.4834 | 286.4834 |
| mean mod.  | 293.0572      | 293.1638 | 292.9616 | 286.4235     | 286.4282 | 286.8911 |
| RMSE       | 1.0476        | 0.5431   | 0.8456   | 1.5962       | 0.7347   | 1.2013   |
| MBE        | -0.1440       | -0.0374  | -0.2396  | -0.0599      | -0.0552  | 0.4077   |
| r          | 0.9781        | 0.9941   | 0.9868   | 0.8361       | 0.9611   | 0.8737   |

| W.Dir. [deg] | 3000 m a.s.l. |          |          | 600 m a.s.l. |          |          |
|--------------|---------------|----------|----------|--------------|----------|----------|
|              | WRF           | ICON-D2  | ALADIN   | WRF          | ICON-D2  | ALADIN   |
| ens. size    | 7604          | 7604     | 7604     | 898          | 898      | 898      |
| mean. obs.   | 225.6659      | 225.6659 | 225.6659 | 168.3376     | 168.3376 | 168.3376 |
| mean mod.    | 225.0100      | 227.9061 | 222.1888 | 163.2312     | 173.1999 | 158.9250 |
| RMSE         | 57.0364       | 41.6589  | 56.2491  | 92.6477      | 25.7007  | 90.2430  |
| MBE          | -0.6549       | 2.2402   | -3.4771  | -5.1064      | 4.8623   | -9.4126  |
| r            | 0.6203        | 0.7988   | 0.6571   | 0.3878       | 0.9556   | 0.4036   |

Table S05: Episode 5: 2022-11-27 00:00:00 - 2022-11-30 12:00:00

| WS [m/s]   | 3000 m a.s.l. |         |         | 600 m a.s.l. |         |        |
|------------|---------------|---------|---------|--------------|---------|--------|
|            | WRF           | ICON-D2 | ALADIN  | WRF          | ICON-D2 | ALADIN |
| ens. size  | 5698          | 5698    | 5698    | 659          | 659     | 659    |
| mean. obs. | 4.1417        | 4.1417  | 4.1417  | 3.5980       | 3.5980  | 3.5980 |
| mean mod.  | 4.1022        | 4.0799  | 4.0740  | 4.4164       | 3.8289  | 3.9006 |
| RMSE       | 1.8620        | 1.2433  | 1.2434  | 2.2258       | 1.0855  | 1.5044 |
| MBE        | -0.0395       | -0.0617 | -0.0677 | 0.8183       | 0.2308  | 0.3026 |
| r          | 0.6474        | 0.8032  | 0.7958  | 0.5626       | 0.7652  | 0.5182 |

| Theta [K]  | 3000 m a.s.l. |          |          | 600 m a.s.l. |          |          |
|------------|---------------|----------|----------|--------------|----------|----------|
|            | WRF           | ICON-D2  | ALADIN   | WRF          | ICON-D2  | ALADIN   |
| ens. size  | 5698          | 5698     | 5698     | 659          | 659      | 659      |
| mean. obs. | 285.5034      | 285.5034 | 285.5034 | 277.6396     | 277.6396 | 277.6396 |
| mean mod.  | 285.3230      | 285.4798 | 285.3024 | 277.5965     | 277.5756 | 277.7103 |
| RMSE       | 1.2150        | 0.6248   | 0.8696   | 1.4448       | 0.7415   | 0.9647   |
| MBE        | -0.1804       | -0.0236  | -0.2010  | -0.0431      | -0.0640  | 0.0707   |
| r          | 0.9761        | 0.9936   | 0.9882   | 0.4877       | 0.8791   | 0.7860   |

| W.Dir. [deg] | 3000 m a.s.l. |          |          | 600 m a.s.l. |          |          |
|--------------|---------------|----------|----------|--------------|----------|----------|
|              | WRF           | ICON-D2  | ALADIN   | WRF          | ICON-D2  | ALADIN   |
| ens. size    | 5698          | 5698     | 5698     | 659          | 659      | 659      |
| mean. obs.   | 203.8924      | 203.8924 | 203.8924 | 158.5479     | 158.5479 | 158.5479 |
| mean mod.    | 196.9039      | 204.3398 | 207.9014 | 167.0591     | 161.3301 | 168.2070 |
| RMSE         | 53.1001       | 27.1723  | 32.9289  | 26.8072      | 25.8049  | 18.4697  |
| MBE          | -6.9885       | 0.4474   | 4.0090   | 8.5112       | 2.7822   | 9.6591   |
| r            | 0.7315        | 0.9324   | 0.9006   | 0.8441       | 0.8437   | 0.9433   |

Table S06: Episode 6: 2022-12-08 06:00:00 - 2022-12-11 00:00:00

| WS [m/s]   | 3000 m a.s.l. |         |         | 600 m a.s.l. |         |        |
|------------|---------------|---------|---------|--------------|---------|--------|
|            | WRF           | ICON-D2 | ALADIN  | WRF          | ICON-D2 | ALADIN |
| ens. size  | 4321          | 4321    | 4321    | 471          | 471     | 471    |
| mean. obs. | 6.5390        | 6.5390  | 6.5390  | 3.6468       | 3.6468  | 3.6468 |
| mean mod.  | 6.3904        | 6.4478  | 6.1261  | 4.4276       | 3.7712  | 4.6355 |
| RMSE       | 2.6810        | 1.2708  | 1.8407  | 1.5363       | 1.2743  | 1.5936 |
| MBE        | -0.1486       | -0.0912 | -0.4129 | 0.7807       | 0.1244  | 0.9887 |
| r          | 0.7005        | 0.9361  | 0.8665  | 0.8047       | 0.8735  | 0.8457 |

| Theta [K]  | 3000 m a.s.l. |          |          | 600 m a.s.l. |          |          |
|------------|---------------|----------|----------|--------------|----------|----------|
|            | WRF           | ICON-D2  | ALADIN   | WRF          | ICON-D2  | ALADIN   |
| ens. size  | 4321          | 4321     | 4321     | 471          | 471      | 471      |
| mean. obs. | 282.0536      | 282.0536 | 282.0536 | 276.7705     | 276.7705 | 276.7705 |
| mean mod.  | 281.8283      | 282.0577 | 282.0838 | 276.1946     | 276.4533 | 276.4782 |
| RMSE       | 1.2230        | 0.6644   | 0.7964   | 1.0363       | 0.5961   | 0.5715   |
| MBE        | -0.2253       | 0.0041   | 0.0302   | -0.5759      | -0.3172  | -0.2923  |
| r          | 0.9665        | 0.9897   | 0.9851   | 0.7778       | 0.9279   | 0.9320   |

| W.Dir. [deg] | 3000 m a.s.l. |          |          | 600 m a.s.l. |          |          |
|--------------|---------------|----------|----------|--------------|----------|----------|
|              | WRF           | ICON-D2  | ALADIN   | WRF          | ICON-D2  | ALADIN   |
| ens. size    | 4321          | 4321     | 4321     | 471          | 471      | 471      |
| mean. obs.   | 226.5675      | 226.5675 | 226.5675 | 191.2169     | 191.2169 | 191.2169 |
| mean mod.    | 213.3720      | 224.6504 | 218.2561 | 161.7442     | 215.6880 | 187.7843 |
| RMSE         | 76.3537       | 57.4781  | 79.7380  | 127.3560     | 80.1106  | 88.6946  |
| MBE          | -13.1955      | -1.9170  | -8.3114  | -29.4726     | 24.4712  | -3.4326  |
| r            | 0.6178        | 0.7658   | 0.5912   | 0.4570       | 0.7882   | 0.7244   |



Table S07: Episode 7: 2023-01-22 00:00:00 - 2023-01-30 00:00:00

| WS [m/s]   | 3000 m a.s.l. |         |         | 600 m a.s.l. |         |        |
|------------|---------------|---------|---------|--------------|---------|--------|
|            | WRF           | ICON-D2 | ALADIN  | WRF          | ICON-D2 | ALADIN |
| ens. size  | 12224         | 12224   | 12224   | 1347         | 1347    | 1347   |
| mean. obs. | 7.0544        | 7.0544  | 7.0544  | 3.6636       | 3.6636  | 3.6636 |
| mean mod.  | 6.9973        | 6.9184  | 6.9076  | 4.0836       | 3.8957  | 4.3709 |
| RMSE       | 1.7603        | 1.2964  | 1.4696  | 2.1234       | 1.0924  | 1.5506 |
| MBE        | -0.0571       | -0.1360 | -0.1468 | 0.4201       | 0.2321  | 0.7073 |
| r          | 0.8738        | 0.9338  | 0.9122  | 0.6921       | 0.9056  | 0.8490 |

| Theta [K]  | 3000 m a.s.l. |          |          | 600 m a.s.l. |          |          |
|------------|---------------|----------|----------|--------------|----------|----------|
|            | WRF           | ICON-D2  | ALADIN   | WRF          | ICON-D2  | ALADIN   |
| ens. size  | 12224         | 12224    | 12224    | 1347         | 1347     | 1347     |
| mean. obs. | 282.7323      | 282.7323 | 282.7323 | 273.4727     | 273.4727 | 273.4727 |
| mean mod.  | 282.5831      | 282.7340 | 282.8216 | 273.0310     | 273.3957 | 273.2551 |
| RMSE       | 1.1342        | 0.8209   | 1.0829   | 1.0349       | 0.2920   | 0.6145   |
| MBE        | -0.1493       | 0.0017   | 0.0893   | -0.4418      | -0.0770  | -0.2176  |
| r          | 0.9832        | 0.9934   | 0.9886   | 0.7363       | 0.9792   | 0.9098   |

| W.Dir. [deg] | 3000 m a.s.l. |          |          | 600 m a.s.l. |          |          |
|--------------|---------------|----------|----------|--------------|----------|----------|
|              | WRF           | ICON-D2  | ALADIN   | WRF          | ICON-D2  | ALADIN   |
| ens. size    | 12224         | 12224    | 12224    | 1347         | 1347     | 1347     |
| mean. obs.   | 116.8070      | 116.8070 | 116.8070 | 145.4419     | 145.4419 | 145.4419 |
| mean mod.    | 105.6133      | 112.4370 | 104.1647 | 123.2024     | 156.9203 | 89.5693  |
| RMSE         | 76.5071       | 71.8640  | 73.5836  | 123.8994     | 147.8780 | 141.8466 |
| MBE          | -11.1937      | -4.3700  | -12.6423 | -22.2395     | 11.4784  | -55.8726 |
| r            | 0.6986        | 0.7498   | 0.7229   | 0.5433       | 0.3984   | 0.3894   |

Table S08: Episode 8: 2023-02-06 00:00:00 - 2023-02-11 00:00:00

| WS [m/s]   | 3000 m a.s.l. |         |         | 600 m a.s.l. |         |        |
|------------|---------------|---------|---------|--------------|---------|--------|
|            | WRF           | ICON-D2 | ALADIN  | WRF          | ICON-D2 | ALADIN |
| ens. size  | 8310          | 8310    | 8310    | 911          | 911     | 911    |
| mean. obs. | 6.9023        | 6.9023  | 6.9023  | 3.3635       | 3.3635  | 3.3635 |
| mean mod.  | 6.9073        | 6.9620  | 6.8012  | 5.1216       | 3.5252  | 4.3041 |
| RMSE       | 2.2876        | 1.4125  | 1.6055  | 3.5220       | 1.0795  | 1.8378 |
| MBE        | 0.0050        | 0.0598  | -0.1010 | 1.7581       | 0.1617  | 0.9406 |
| r          | 0.7915        | 0.9232  | 0.8983  | 0.7187       | 0.9192  | 0.8385 |

| Theta [K]  | 3000 m a.s.l. |          |          | 600 m a.s.l. |          |          |
|------------|---------------|----------|----------|--------------|----------|----------|
|            | WRF           | ICON-D2  | ALADIN   | WRF          | ICON-D2  | ALADIN   |
| ens. size  | 8310          | 8310     | 8310     | 911          | 911      | 911      |
| mean. obs. | 280.1616      | 280.1616 | 280.1616 | 271.0146     | 271.0146 | 271.0146 |
| mean mod.  | 279.7813      | 280.1090 | 279.9262 | 271.3481     | 270.6315 | 271.4839 |
| RMSE       | 1.1334        | 0.7351   | 0.8374   | 1.0307       | 0.8761   | 1.0785   |
| MBE        | -0.3803       | -0.0526  | -0.2354  | 0.3335       | -0.3831  | 0.4693   |
| r          | 0.9882        | 0.9942   | 0.9927   | 0.9039       | 0.9453   | 0.9050   |

| W.Dir. [deg] | 3000 m a.s.l. |          |          | 600 m a.s.l. |          |          |
|--------------|---------------|----------|----------|--------------|----------|----------|
|              | WRF           | ICON-D2  | ALADIN   | WRF          | ICON-D2  | ALADIN   |
| ens. size    | 8310          | 8310     | 8310     | 911          | 911      | 911      |
| mean. obs.   | 158.6581      | 158.6581 | 158.6581 | 178.0343     | 178.0343 | 178.0343 |
| mean mod.    | 154.2268      | 156.5691 | 162.8395 | 172.2907     | 163.8846 | 202.1606 |
| RMSE         | 60.7553       | 52.4265  | 54.4268  | 96.9434      | 97.9929  | 75.1761  |
| MBE          | -4.4313       | -2.0890  | 4.1814   | -5.7436      | -14.1497 | 24.1263  |
| r            | 0.8316        | 0.8772   | 0.8840   | 0.2895       | 0.3229   | 0.6185   |

Table S09: Episode 9: 2023-02-13 00:00:00 - 2023-02-16 00:00:00

| WS [m/s]   | 3000 m a.s.l. |         |        | 600 m a.s.l. |         |        |
|------------|---------------|---------|--------|--------------|---------|--------|
|            | WRF           | ICON-D2 | ALADIN | WRF          | ICON-D2 | ALADIN |
| ens. size  | 5240          | 5240    | 5240   | 572          | 572     | 572    |
| mean. obs. | 5.5750        | 5.5750  | 5.5750 | 2.2548       | 2.2548  | 2.2548 |
| mean mod.  | 5.8333        | 5.4547  | 5.6748 | 2.8292       | 2.6335  | 2.8703 |
| RMSE       | 1.7576        | 1.2086  | 1.4170 | 2.6460       | 1.2547  | 2.0063 |
| MBE        | 0.2583        | -0.1203 | 0.0998 | 0.5744       | 0.3786  | 0.6155 |
| r          | 0.8436        | 0.9268  | 0.8966 | 0.1770       | 0.6188  | 0.2809 |

| Theta [K]  | 3000 m a.s.l. |          |          | 600 m a.s.l. |          |          |
|------------|---------------|----------|----------|--------------|----------|----------|
|            | WRF           | ICON-D2  | ALADIN   | WRF          | ICON-D2  | ALADIN   |
| ens. size  | 5240          | 5240     | 5240     | 572          | 572      | 572      |
| mean. obs. | 290.1704      | 290.1704 | 290.1704 | 276.3340     | 276.3340 | 276.3340 |
| mean mod.  | 290.2200      | 290.2321 | 290.8033 | 277.7849     | 276.4161 | 277.9397 |
| RMSE       | 2.1525        | 0.7033   | 1.8160   | 3.9958       | 0.6092   | 2.6984   |
| MBE        | 0.0496        | 0.0617   | 0.6329   | 1.4509       | 0.0821   | 1.6057   |
| r          | 0.9723        | 0.9967   | 0.9830   | -0.3726      | 0.9733   | 0.5927   |

| W.Dir. [deg] | 3000 m a.s.l. |          |          | 600 m a.s.l. |          |          |
|--------------|---------------|----------|----------|--------------|----------|----------|
|              | WRF           | ICON-D2  | ALADIN   | WRF          | ICON-D2  | ALADIN   |
| ens. size    | 5240          | 5240     | 5240     | 572          | 572      | 572      |
| mean. obs.   | 244.5890      | 244.5890 | 244.5890 | 222.6436     | 222.6436 | 222.6436 |
| mean mod.    | 257.2488      | 241.1400 | 266.6472 | 214.9036     | 207.3581 | 237.7551 |
| RMSE         | 169.1670      | 151.9895 | 145.5366 | 112.7940     | 117.4503 | 103.3530 |
| MBE          | 12.6598       | -3.4490  | 22.0582  | -7.7400      | -15.2855 | 15.1115  |
| r            | 0.0203        | 0.2755   | 0.2447   | -0.1417      | -0.3610  | -0.0977  |



## C. Comparison of the ICON, WRF, and ALADIN simulations with with LIDAR and Microwave observations

A statistical analysis of the potential temperature, wind speed, and wind direction vertical profiles done for the mesoscale models (ICON, WRF, and ALADIN) against the LIDAR and MW observations gathered during the observation campaign for Episode 9: ens. size-ensemble size; mean obs.-mean value observations; mean mod.-mean value from the mesoscale model; RMSE- root mean square error; MBE-mean bias error; r-correlation coefficient. The red color indicates the model with the worst, and the green color indicates the model with the best statistical metrics out of the three.

*Table S10: Episode 9: 2023-02-13 00:00:00 - 2023-02-16 00:00:00*

| WS [m/s]   | snr >= 1.015; 1700 m a.s.l. |         |         |
|------------|-----------------------------|---------|---------|
|            | WRF                         | ICON-D2 | ALADIN  |
| ens. size  | 15497                       | 15497   | 15497   |
| mean. obs. | 3.4517                      | 3.4517  | 3.4517  |
| mean mod.  | 3.4358                      | 2.6879  | 3.0232  |
| RMSE       | 2.6689                      | 2.4505  | 2.2059  |
| MBE        | -0.0159                     | -0.7638 | -0.4285 |
| r          | 0.3515                      | 0.4106  | 0.5339  |

| Theta [K]  | 1261 m a.s.l. |          |          |
|------------|---------------|----------|----------|
|            | WRF           | ICON-D2  | ALADIN   |
| ens. size  | 1606          | 1606     | 1606     |
| mean. obs. | 279.8331      | 279.8331 | 279.8331 |
| mean mod.  | 280.8903      | 279.9068 | 280.7523 |
| RMSE       | 2.9268        | 1.8301   | 2.0779   |
| MBE        | 1.0572        | 0.0737   | 0.9192   |
| r          | 0.7859        | 0.9259   | 0.9026   |

| Temp [deg] | 1261 m a.s.l. |         |        |
|------------|---------------|---------|--------|
|            | WRF           | ICON-D2 | ALADIN |
| ens. size  | 1606          | 1606    | 1606   |
| mean. obs. | 3.0442        | 3.0442  | 3.0442 |
| mean mod.  | 3.6779        | 2.6708  | 3.4216 |

|      |        |        |        |
|------|--------|--------|--------|
| RMSE | 2.5896 | 1.7501 | 1.7325 |
| MBE  | 0.6337 | 0.3734 | 0.3774 |
| r    | 0.3767 | 0.8389 | 0.7480 |

| W.Dir. [deg] | snr >= 1.015; 1700 m a.s.l. |          |          |
|--------------|-----------------------------|----------|----------|
|              | WRF                         | ICON-D2  | ALADIN   |
| ens. size    | 15497                       | 15497    | 15497    |
| mean. obs.   | 223.5329                    | 223.5329 | 223.5329 |
| mean mod.    | 227.1142                    | 228.5869 | 248.6291 |
| RMSE         | 87.3645                     | 103.3606 | 83.7829  |
| MBE          | 3.5812                      | 5.0529   | 25.0961  |
| r            | 0.5088                      | 0.2981   | 0.5268   |

# D. Comparison of the wind speed, wind direction, and potential temperature profiles modeled by mesoscale models with LIDAR and MW observations

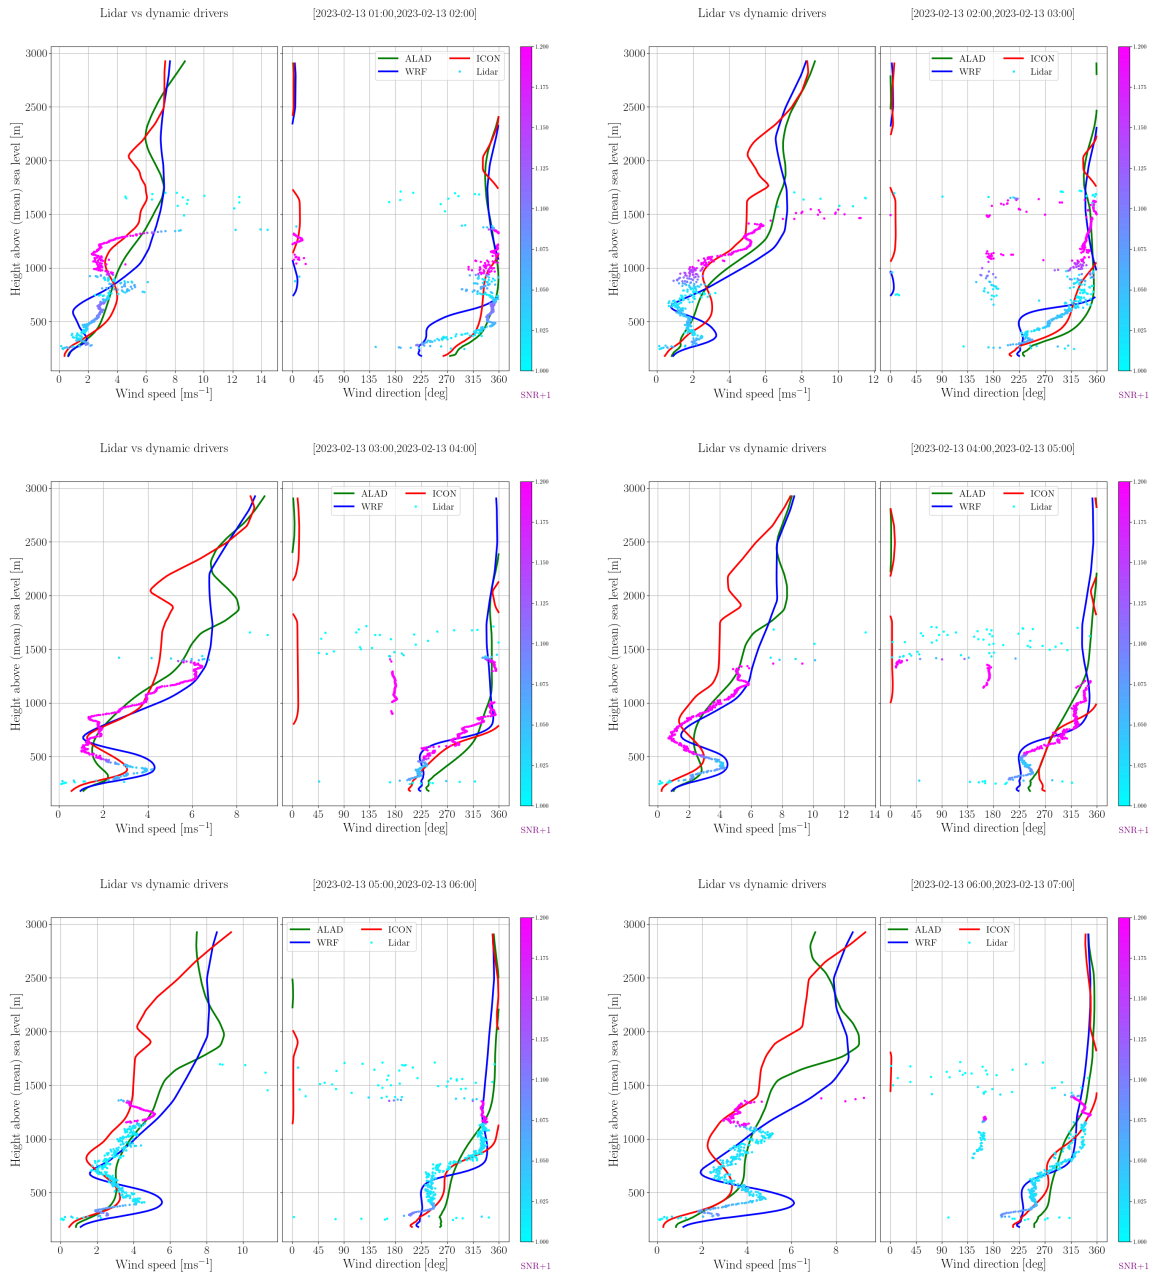



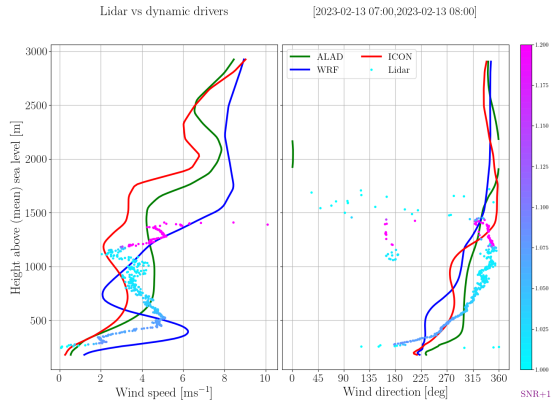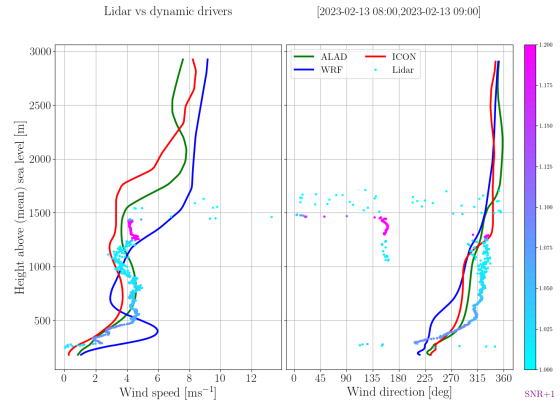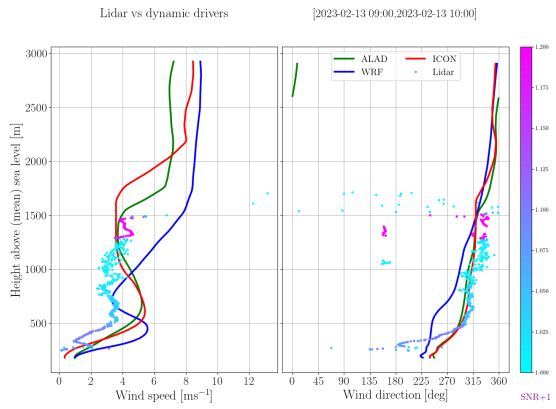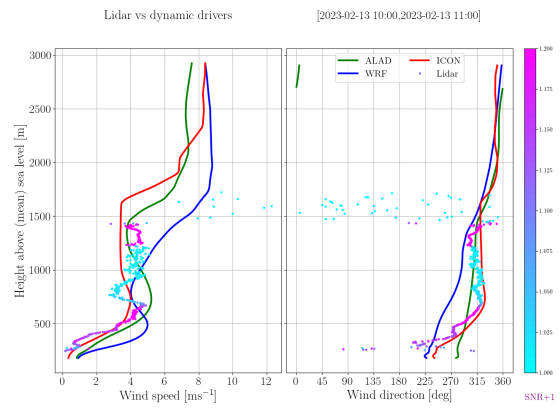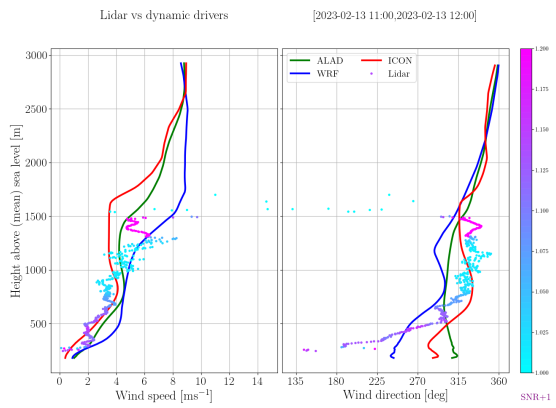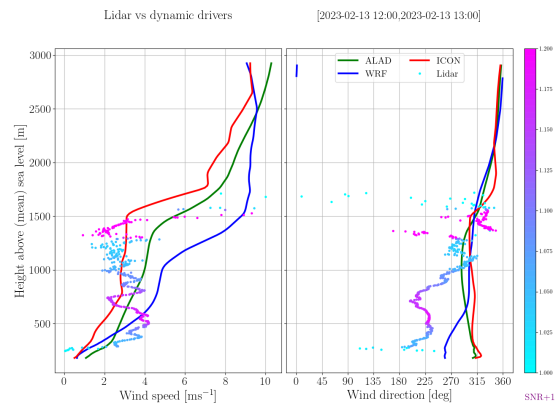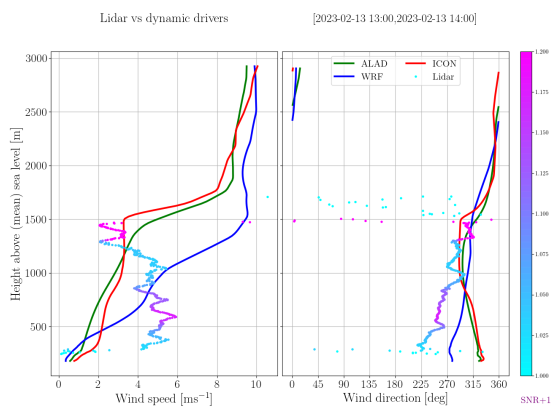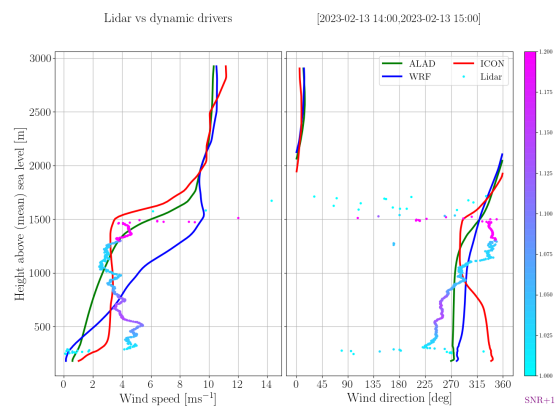

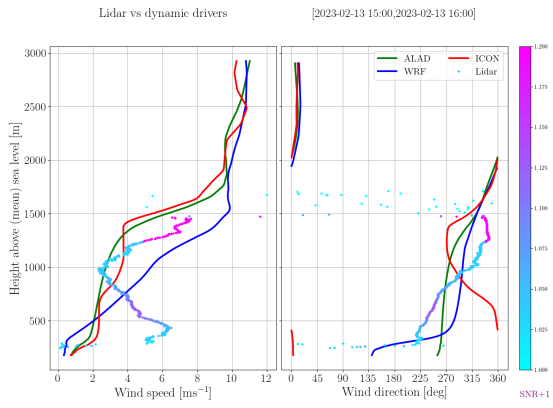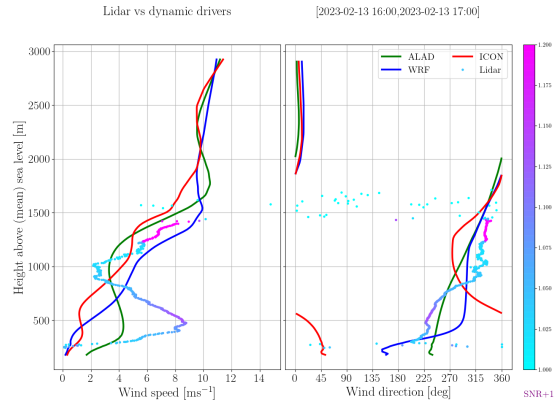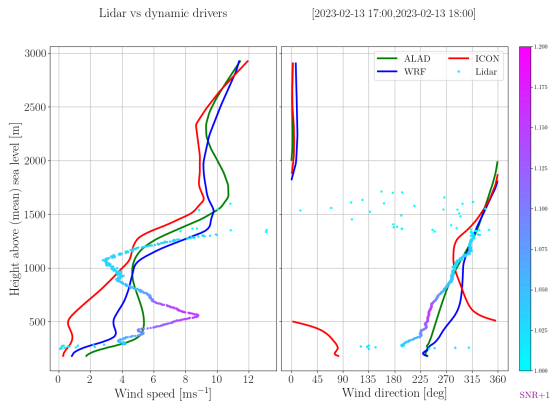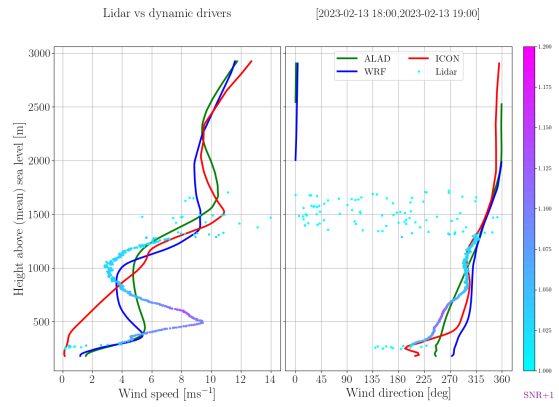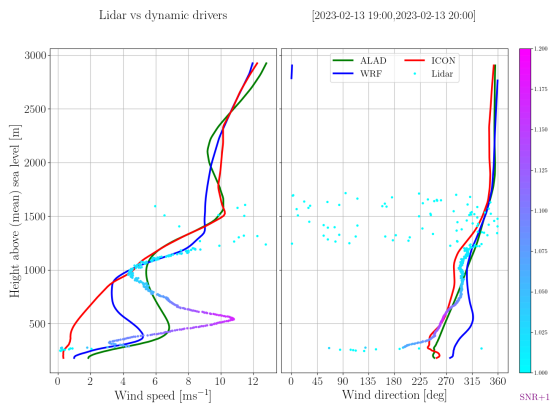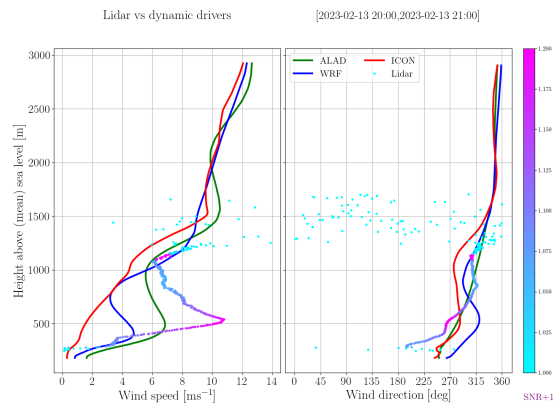

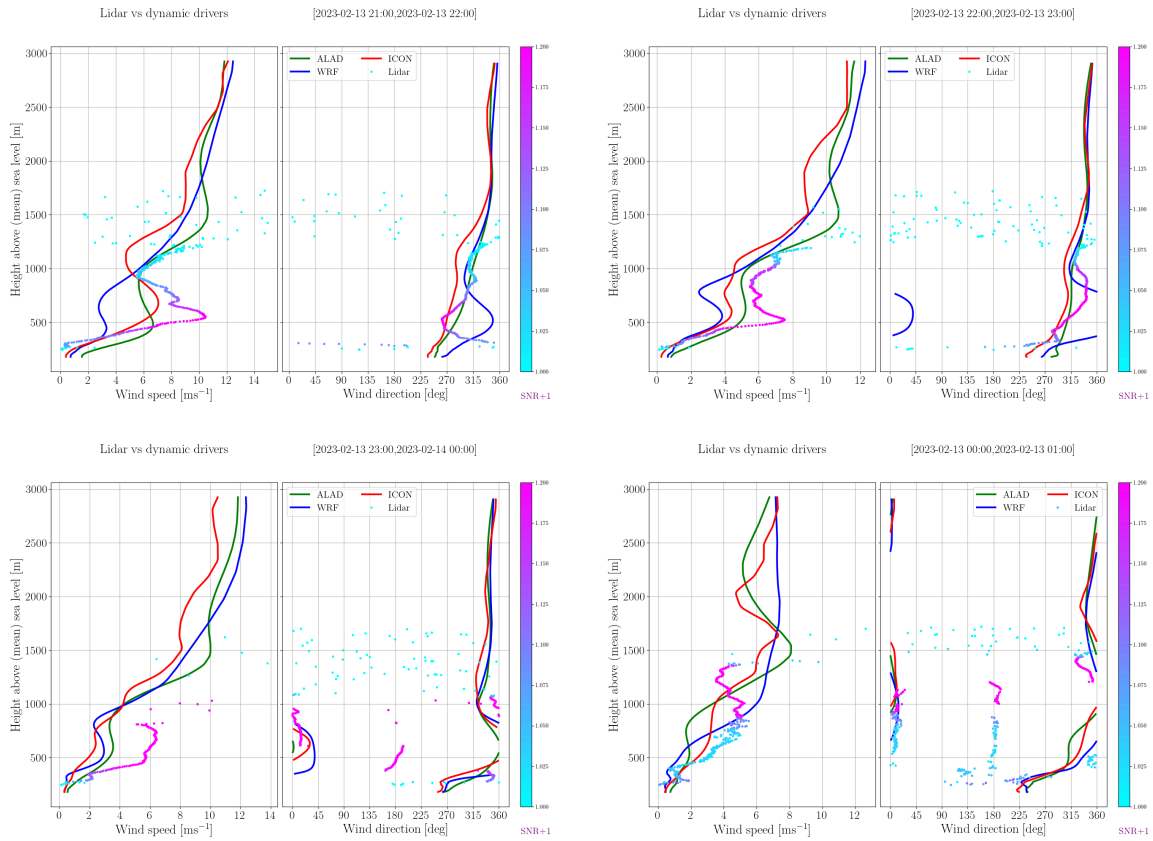

**Fig. S11: Comparison of the wind speed and wind direction profiles modeled by mesoscale models ICON (red), ALADIN (green), and WRF (blue) used as PALM model BC with profiles from LIDAR observations for 13.2.2023. The color of the LIDAR observation dotted line shows the LIDAR signal/noise ratio and the uncertainty of the observation.**

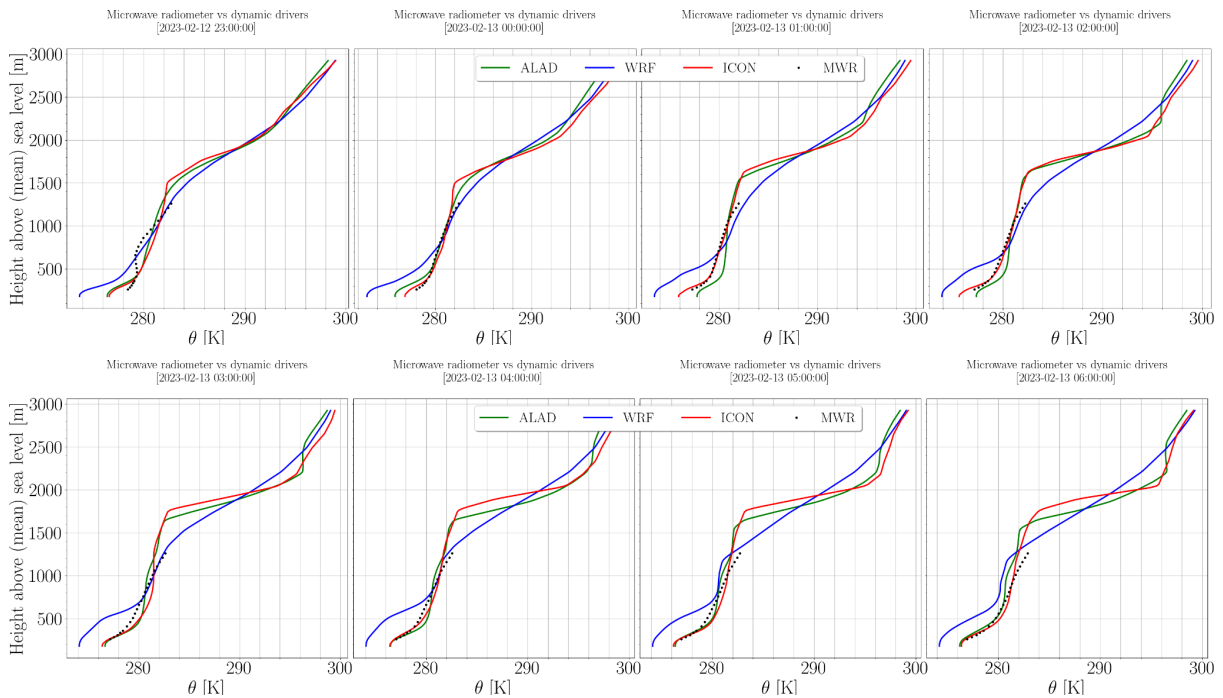



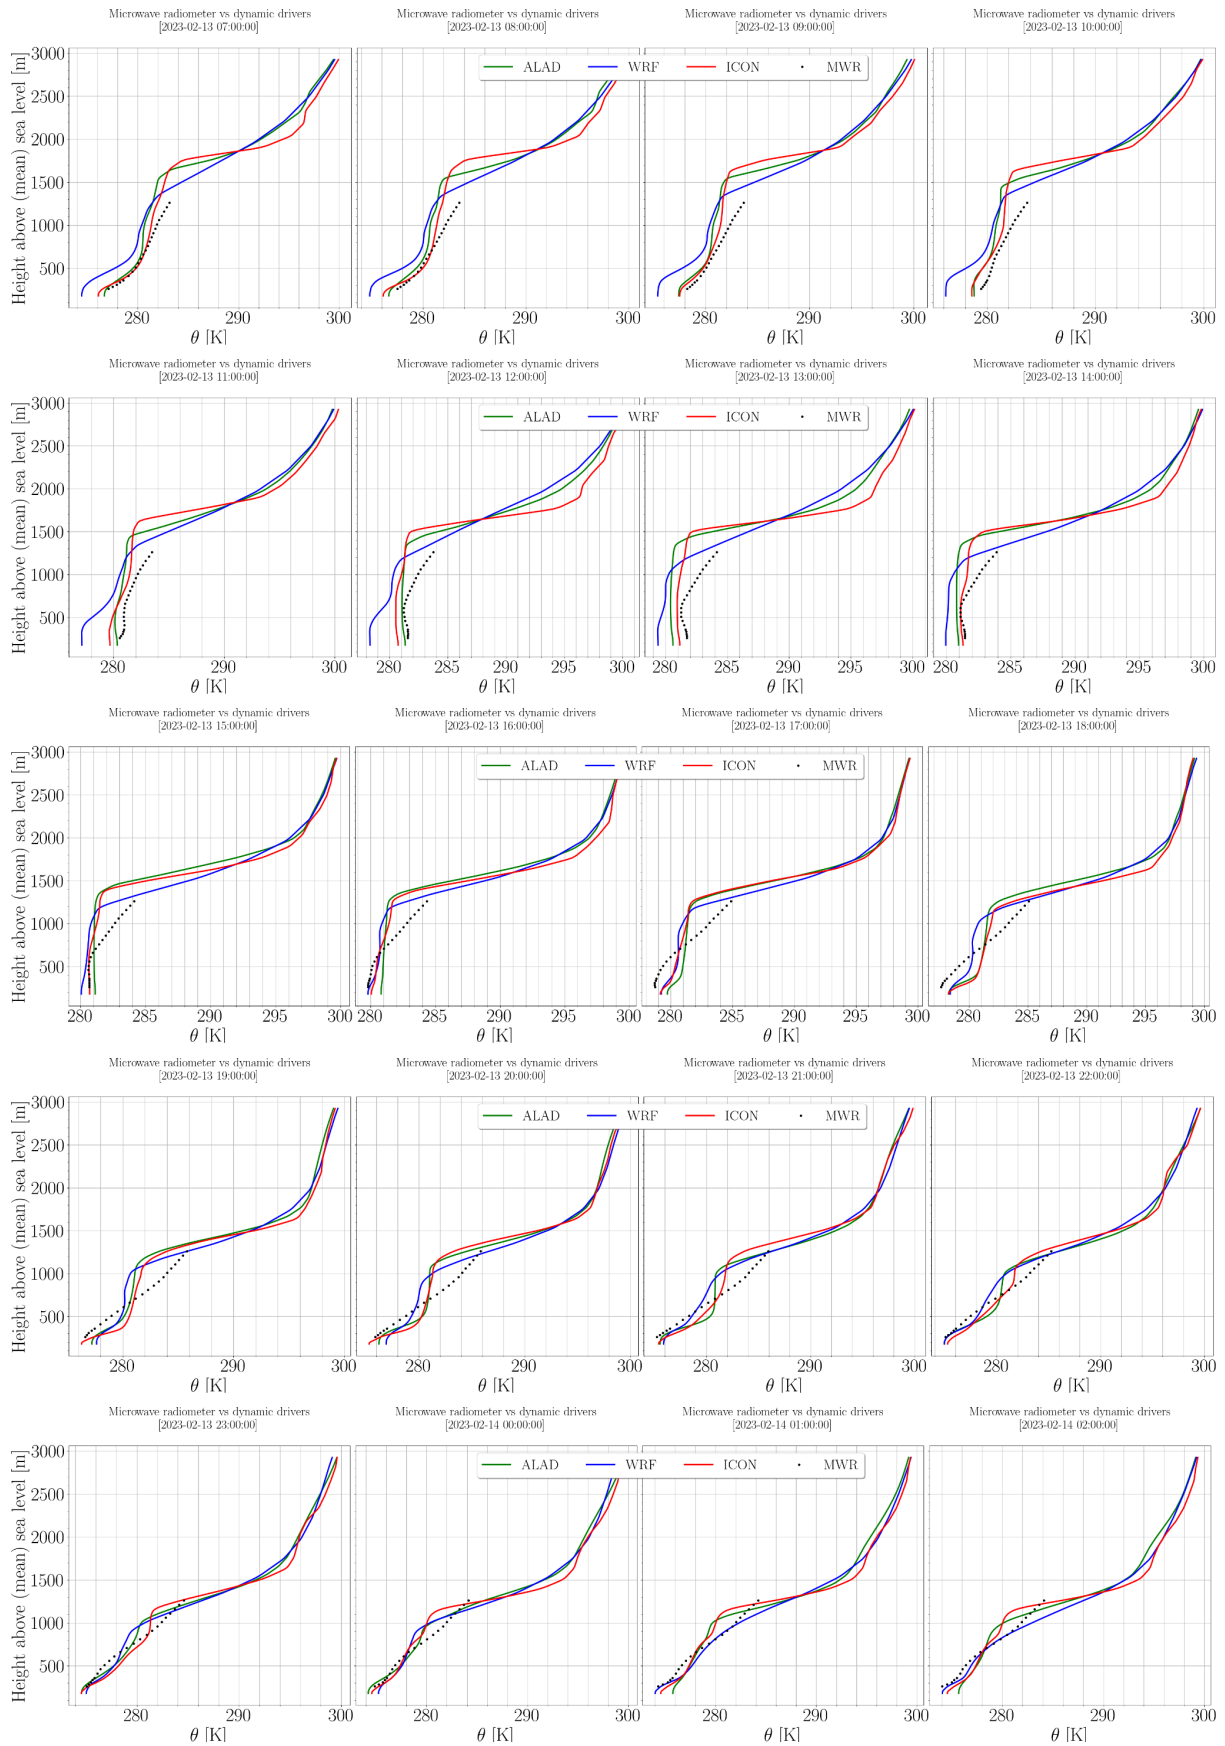

**Fig. S12: Comparison of the potential temperature profiles modeled by mesoscale models ICON (red), ALADIN (green), and WRF (blue) used as PALM model BC with profiles from MW observations for 13.2.2023.**

## E. Air quality sensor network

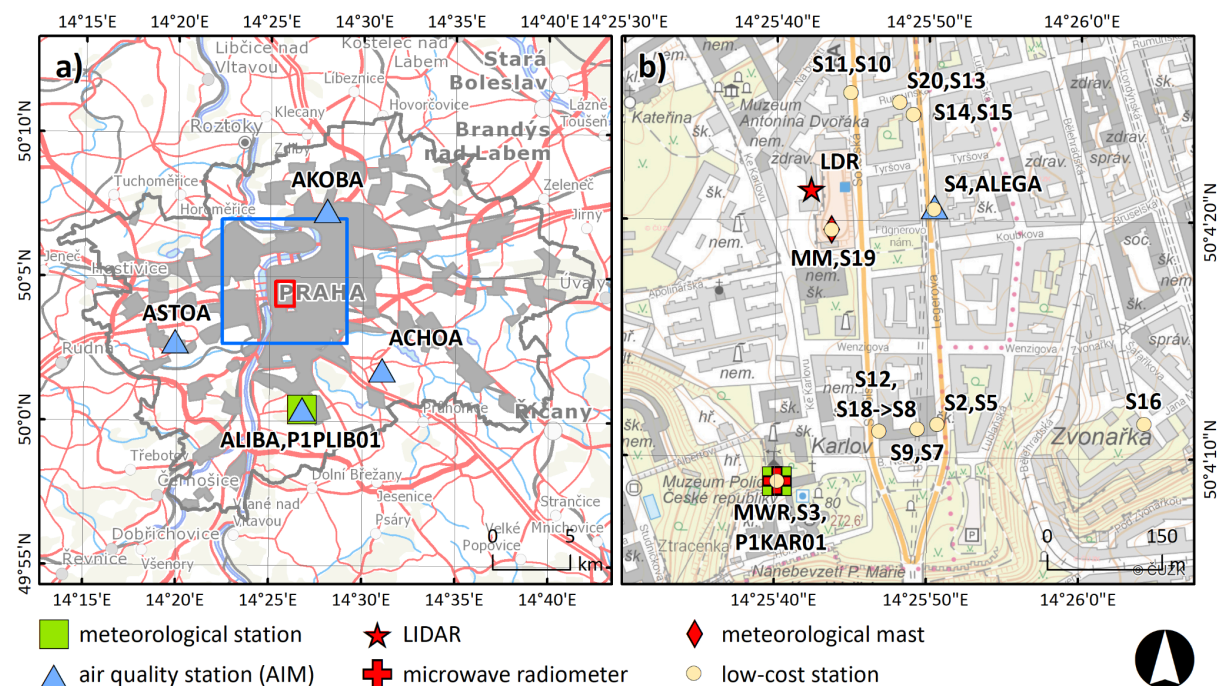

*Fig. S13: Locations of air quality stations used for the construction of boundary conditions and Praha 4-Libuš used for profile validation (a). Measurement locations in Legerova street and its surroundings (b) of individual low-cost sensors for air quality monitoring (stations with S prefix) and supplementary meteorological measurements. If there is a pair of sensors in one location, the lower one is listed first. Detailed information about locations and abbreviations used in this figure are explained in Table S11. Background data in (a) is a WMS service with ArcČR layer (<https://www.arcdata.cz/cs-cz/produkty/data/arcchr>), topographical map in (b) is web map service of the Czech Office for Surveying, Mapping and Cadastre – ČÚZK.*

*Table S11: List of all measurements used for the TURBAN project with the locations metadata. Coordinates are given in decimal degrees. Station classification follows the classification method used in the air quality RM network (CHMI, Czech Republic). Air quality low-cost sensors (LCSs) placed in higher height (within pairs) are underlined in blue, LCSs collocated with reference monitors (RM) are underlined in gray.*

| Station name | Station ID | Final deployment location name   | Latitude  | Longitude | Ground elevation (m ASL) | Height (m AGL) | Station classification* | Measurement start date |
|--------------|------------|----------------------------------|-----------|-----------|--------------------------|----------------|-------------------------|------------------------|
| AQ Sensor 2  | <b>S2</b>  | school Legerova (lower height)   | 50.069833 | 14.43075  | 237                      | 5.8            | T                       | 30/05/2022             |
| AQ Sensor 5  | <b>S5</b>  | school Legerova (higher height)  | 50.069833 | 14.43075  | 237                      | 13.2           | T                       | 30/05/2022             |
| AQ Sensor 9  | <b>S9</b>  | School courtyard (lower height)  | 50.069778 | 14.430389 | 237                      | 4.7            | UB                      | 31/05/2022             |
| AQ Sensor 7  | <b>S7</b>  | School courtyard (higher height) | 50.069778 | 14.430389 | 237                      | 6.9            | UB                      | 31/05/2022             |
| AQ Sensor 12 | <b>S12</b> | school Sokolská (lower height)   | 50.06975  | 14.429694 | 236                      | 5.9            | T                       | 30/05/2022             |
| AQ Sensor 18 | <b>S18</b> | school Sokolská (higher height)  | 50.06975  | 14.429694 | 236                      | 13.1           | T                       | 30/05/2022             |
| AQ Sensor 8  | <b>S8</b>  | RM Libuš                         | 50.0073   | 14.44593  | 301                      | 2.5            | SUB                     | 22/05/2022             |
|              |            | school Sokolská (higher height)  | 50.06975  | 14.429694 | 236                      | 13.1           | UB                      | 15/02/2023             |
| AQ Sensor 14 | <b>S14</b> | Legerova (lower height)          | 50.073472 | 14.430278 | 236                      | 9.2            | T                       | 30/05/2022             |
| AQ Sensor 15 | <b>S15</b> | Legerova (higher height)         | 50.073472 | 14.430278 | 236                      | 14.6           | T                       | 30/05/2022             |
| AQ Sensor 20 | <b>S20</b> | Rumunská (lower height)          | 50.073611 | 14.430028 | 236                      | 4.6            | T                       | 30/05/2022             |
| AQ Sensor 13 | <b>S13</b> | Rumunská (higher height)         | 50.073611 | 14.430028 | 236                      | 14.8           | T                       | 30/05/2022             |
| AQ Sensor 11 | <b>S11</b> | CKAIT Sokolská (lower height)    | 50.073722 | 14.429139 | 235                      | 5.5            | T                       | 30/05/2022             |
| AQ Sensor 10 | <b>S10</b> | CKAIT Sokolská (higher height)   | 50.073722 | 14.429139 | 235                      | 12.2           | T                       | 31/05/2022             |

|                           |                 |                                         |            |            |     |        |                |            |
|---------------------------|-----------------|-----------------------------------------|------------|------------|-----|--------|----------------|------------|
| AQ Sensor 19              | <b>S19</b>      | PVK garden<br>(on<br>meteo-mast)        | 50.072111  | 14.428806  | 241 | 2.6    | U              | 01/06/2022 |
| AQ Sensor 3               | <b>S3</b>       | MS Karlov<br>(roof)                     | 50.069157  | 14.427839  | 235 | 30     | UB             | 23/02/2022 |
| AQ Sensor 16              | <b>S16</b>      | Hotel Le Palais<br>Art Prague<br>(roof) | 50.069854  | 14.434532  | 238 | 22     | UB             | 19/07/2022 |
| AQ Sensor 4               | <b>S4</b>       | RM Legerova                             | 50.072361  | 14.430667  | 238 | 2.1    | T<br>(hotspot) | 24/03/2022 |
| AQ Sensor 6               | <b>S6</b>       | RM Libuš                                | 50.007305  | 14.445933  | 301 | 2.5    | SUB            | 16/12/2021 |
| AQ Sensor 17              | <b>S17</b>      | RM Libuš                                | 50.007305  | 14.445933  | 301 | 2.5    | SUB            | 16/12/2021 |
| Doppler LIDAR             | <b>LDR</b>      | PVK roof                                | 50.072588  | 14.428428  | 235 | 4.5    | U              | 24/03/2022 |
| Microwave<br>radiometer   | <b>MWR</b>      | MS Karlov<br>roof**                     | 50.069157  | 14.427839  | 235 | 29.5   | UB             | 23/02/2022 |
| Meteo-mast<br>PVK         | <b>MM</b>       | PVK garden                              | 50.072111  | 14.428806  | 241 | 7.5*** | U              | 01/06/2022 |
| AQM Praha 2 -<br>Legerova | <b>ALEGA</b>    | RM Legerova                             | 50.072388  | 14.430673  | 238 | 3.5    | T<br>(hotspot) | continuous |
| AQM Praha 4 -<br>Libuš    | <b>ALIBA</b>    | RM Libuš                                | 50.007304  | 14.445933  | 301 | 3.5    | SUB            | continuous |
| MS Praha 2 -<br>Karlov    | <b>P1PKAR01</b> | MS Karlov<br>roof**                     | 50.069167  | 14.427778  | 235 | 28.5   | UB             | continuous |
| MS Praha 4 -<br>Libuš     | <b>P1PLIB01</b> | MS Libuš                                | 50.007778  | 14.446944  | 302 | 10     | SUB            | continuous |
| Praha 5 -<br>Stodůlky     | <b>ASTOA</b>    | ---                                     | 50.0461311 | 14.3314133 | 309 | 3.5    | UB             | continuous |
| Praha 8 -<br>Kobylisy     | <b>AKOBA</b>    | ---                                     | 50.1221886 | 14.4675781 | 269 | 3.5    | SUB            | continuous |
| Praha 4 -<br>Chodov       | <b>ACHOA</b>    | ---                                     | 50.0301706 | 14.5174503 | 300 | 3.5    | UB             | continuous |
| Praha 4 - Libuš           | <b>ALIBA</b>    | ---                                     | 50.007423  | 14.4461857 | 302 | 3.5    | SUB            | continuous |

\*T = urban traffic, UB = urban background, SUB = suburban background, U = urban

\*\* MS Karlov is placed on the top of the building roof at 28.5 m AGL.

\*\*\* The height of wind measurement at the top of the meteorological mast.



## F. Calculation of the anthropogenic heat from cars.

As the detailed information on the anthropogenic heat from cars was not available, the goal of this scenario was not to provide an accurate representation of the actual heat flux from cars, but rather to provide an upper bound estimation and then study the sensitivity of the model to the added heat flux.

The total heat flux from cars was estimated as the worst-case scenario from the expected number of cars on the Sokolská and Legerova streets, their estimated running and idling fuel consumption and the energy density of the respective fuels. In order to avoid singularities between the running and idling consumptions, the idling consumption per unit of time

$r_0 = 1 \text{ lh}^{-1}$  was subtracted from the reference total consumption  $c_{v_r} = 10 \frac{1}{100 \text{ km}}$  for low speed driving reference speed  $v_r = 35 \text{ kmh}^{-1}$  and not fully warmed up engine using a

simple formula  $\hat{c} = c_{v_r} - \frac{r_0}{v_r}$  where  $\hat{c}$  is the speed-independent component of consumption per unit of distance. The consumption at speed  $v$  (applicable for city driving speeds) per unit of time is then calculated as  $r_v = r_0 + \hat{c}v$  which matches the idling consumption  $r_0$  as well

as the reference consumption  $c_{v_r} = \frac{r_{v_r}}{v_r}$ . The average street area corresponding to each car

was calculated as  $a_c = \frac{w_s}{n_l}(l_c + l_0 + l_v)$  where  $w_s = 21 \text{ m}$  is the total width of the street,  $n_l = 4$  is the number of driving lanes,  $l_c = 4.5 \text{ m}$  is the reference car length,  $l_0 = 1.5 \text{ m}$  is the distance between the cars when stationary and  $l_v$  is the speed-dependent stopping distance between the cars which is calculated as  $l_v = vt_s$  where  $t_s = 1 \text{ s}$ . The final

anthropogenic heat flux per unit of area was then calculated as  $\phi_q = \frac{r_v U}{a_c}$  where  $U$  is the energy density of the respective fuel. We assumed 40 % of diesel cars with  $U = 38.6 \text{ MJl}^{-1}$  and 60 % of petrol cars with  $U = 34.8 \text{ MJl}^{-1}$ .

In the end, the high estimate heat flux value of  $300 \text{ Wm}^{-2}$  was matched to the transportation emission flux of  $\text{PM}_{10}$  on the Sokolská and Legerova streets at peak traffic hour at  $12 \cdot 10^{-9} \mu\text{g m}^{-2} \text{ s}^{-1}$ . This ratio of  $25 \cdot 10^9 \text{ J kg}^{-1}$  was then used to estimate the heat flux from cars at other locations and at other times.

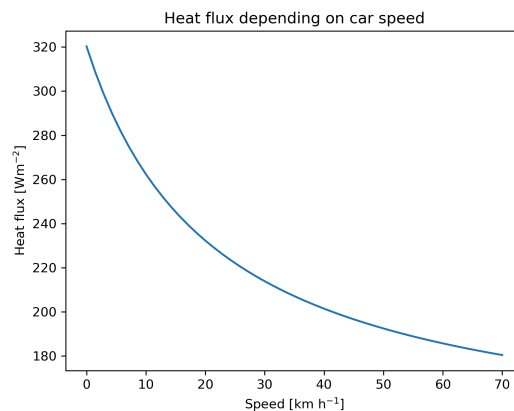

Fig. S14: Dependence of the calculated heat flux produced by cars per unit of area on speed of traffic flow.

## G. Comparison of the PALM modeled concentrations of PM<sub>10</sub> with values observed by sensor stations S14 and S15.

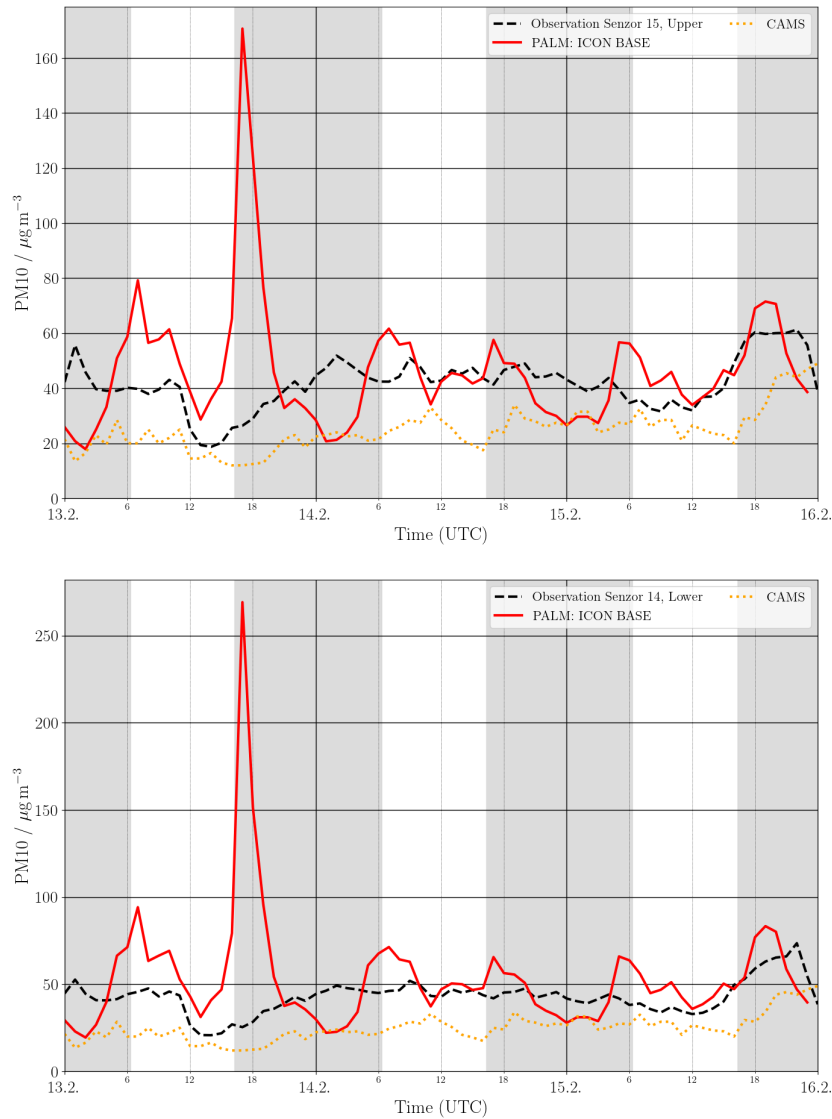

Fig. S15: Comparison of the PALM modeled and observed concentrations of PM<sub>10</sub> on the sensors S14 and S15. Observations are represented by the black dashed line and the ICON base scenario is shown by the solid red line. The orange dotted line (CAMS) represents the analysis of the observations and CAMS model used as the BC.

## H. Comparison of the PALM modeled concentrations of PM<sub>2.5</sub> with values observed by ALEGA AIM station.

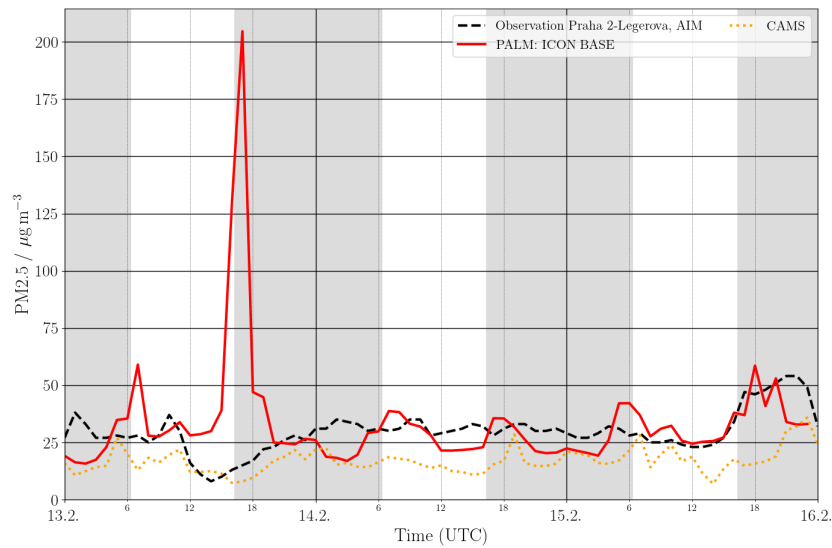

Fig. S16: Comparison of the PALM modeled and observed concentrations of PM<sub>2.5</sub> on the AIM station ALEGA. Observations are represented by the black dashed line and the ICON base scenario is shown by the solid red line. The orange dotted line (CAMS) represents the analysis of the observations and CAMS model used as the BC.

# I. Modeled and observed profiles of wind speed and wind direction.

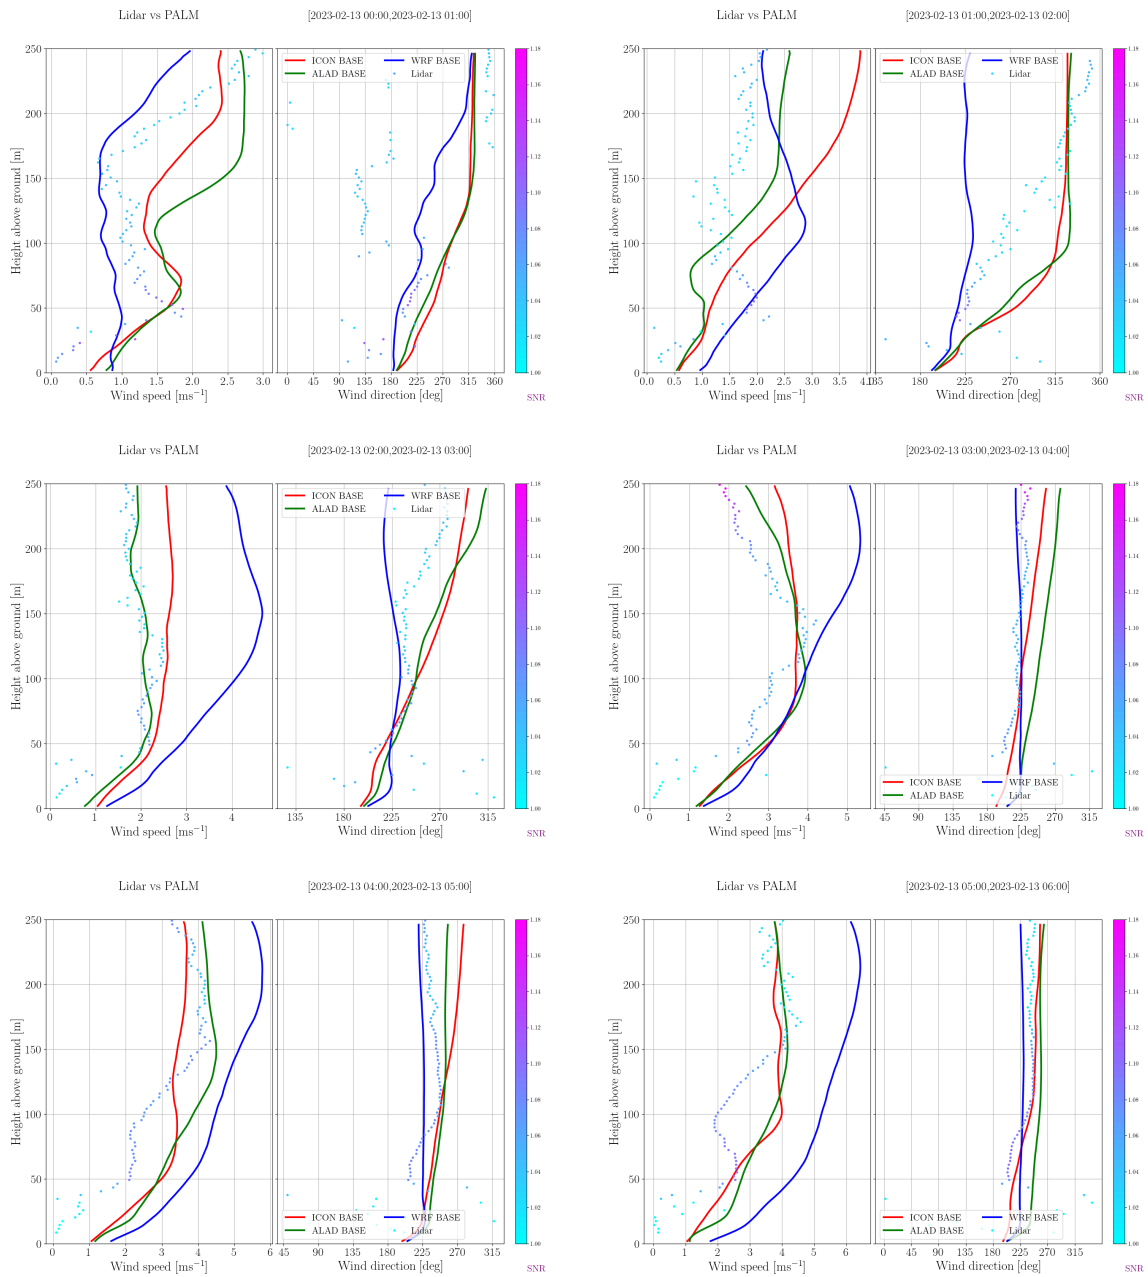

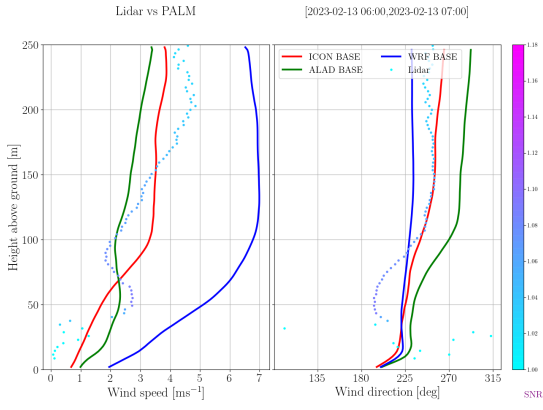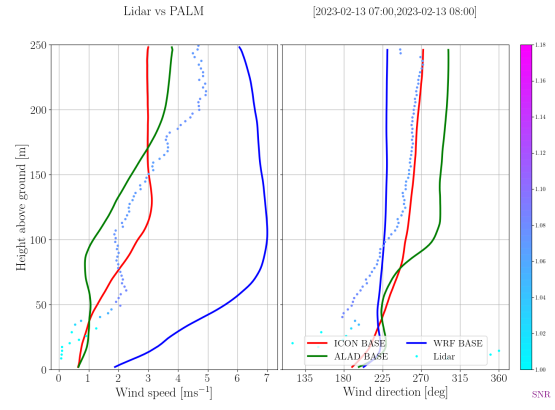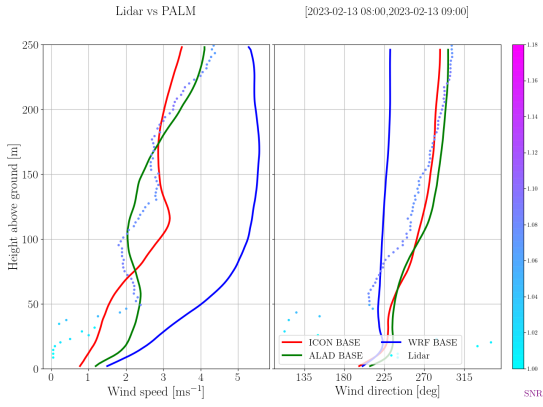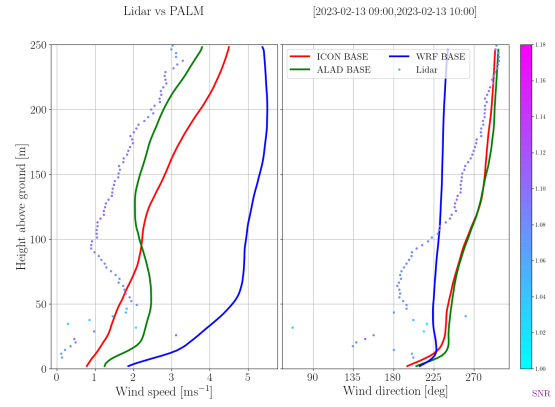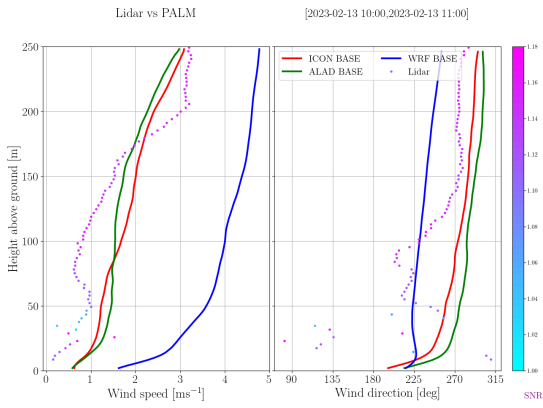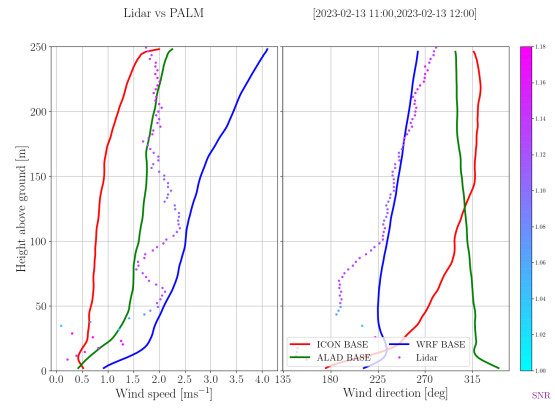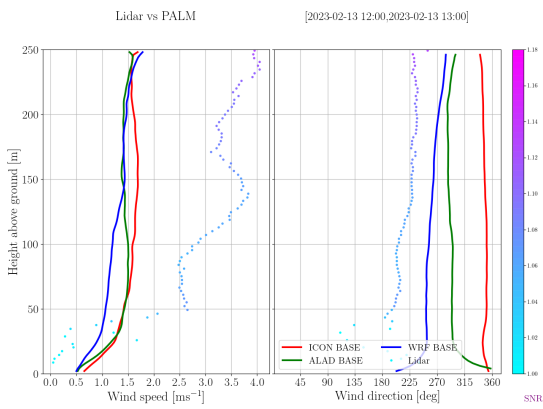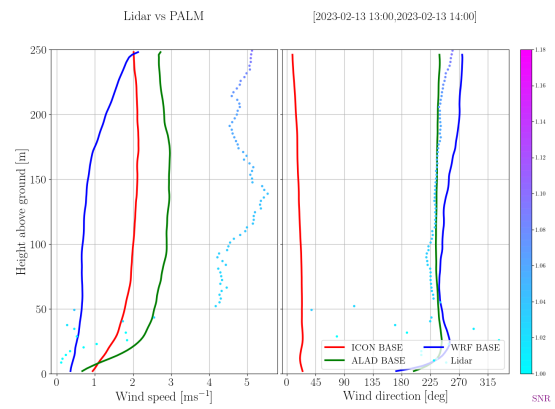



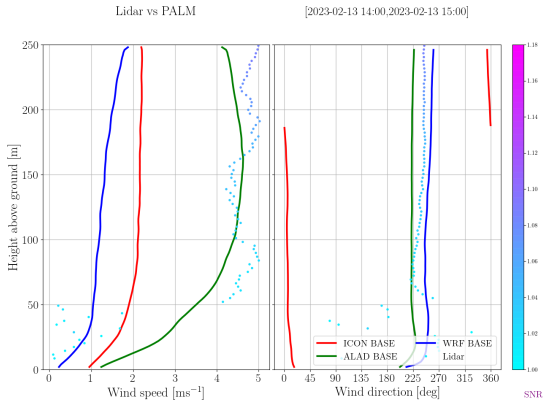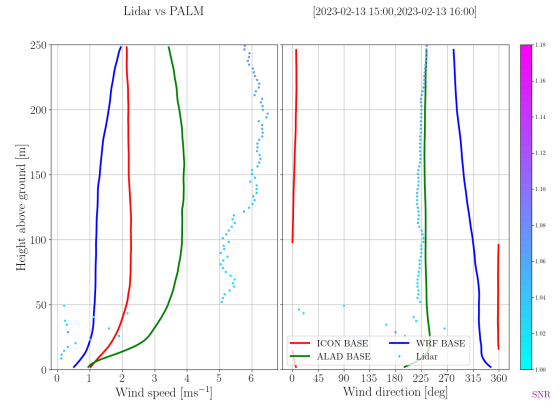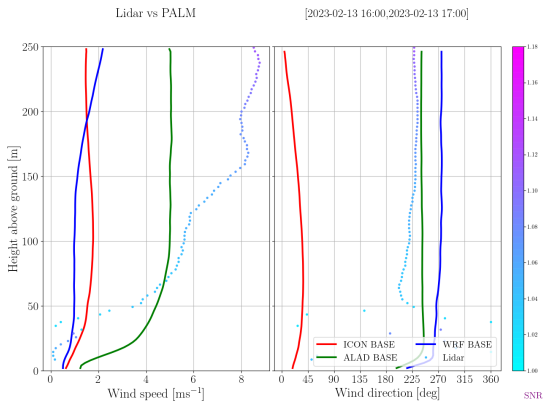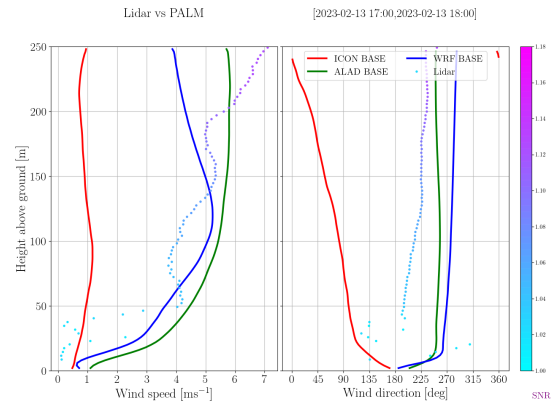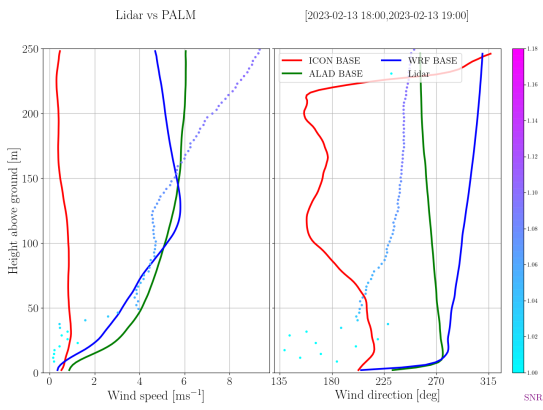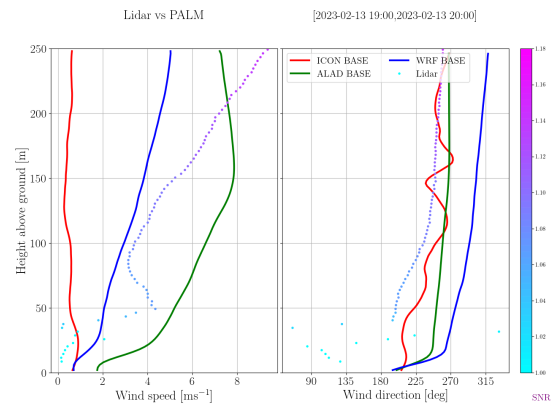

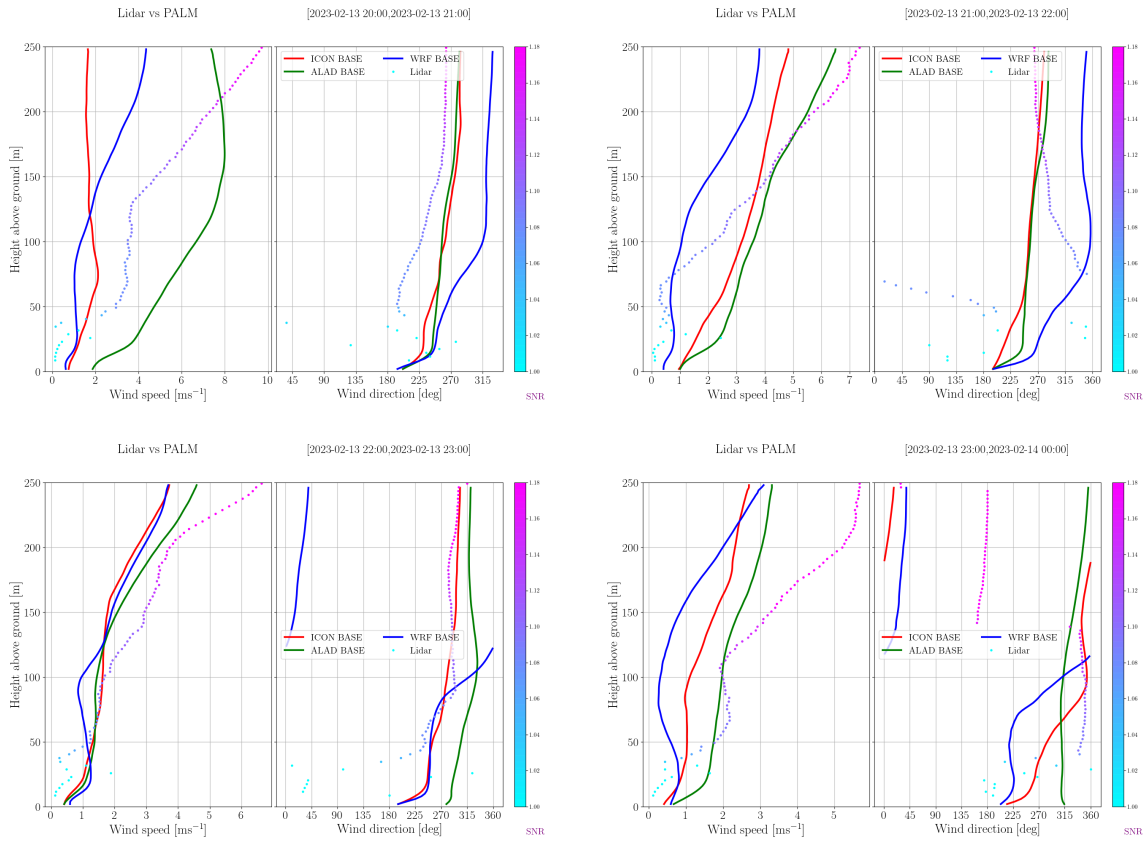

**Fig. S17: Vertical profiles of PALM modeled wind speed and wind direction with LIDAR observations for scenarios PALM-ICON, PALM-ALAD, and PALM-WRF for day 13.2.2023. Values represent hourly averages for the hour ending in the given time.**

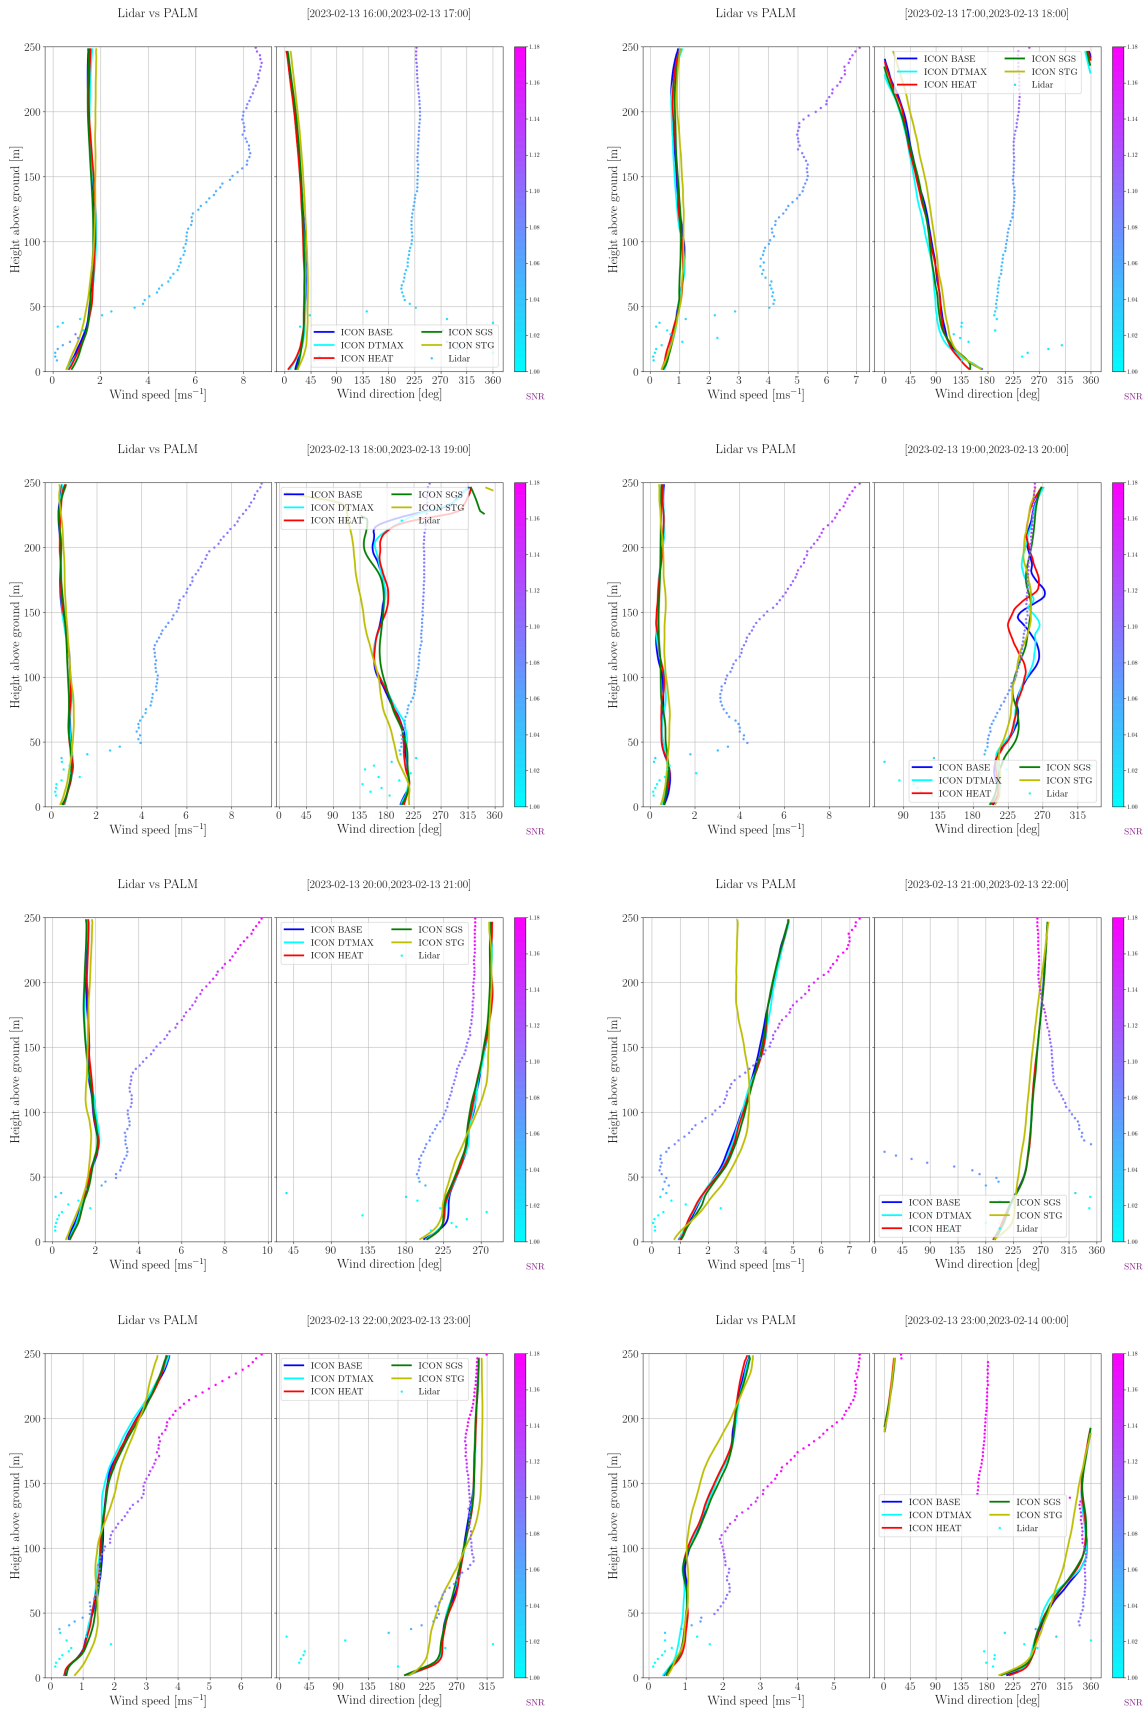

**Fig.S18: Comparison of the hourly averaged PALM modeled wind speed and wind direction with LIDAR observations (dotted line) for PALM-ICON (blue) model and HEAT (red), SGS (green), STG (yellow), and DTMAX (cyan) scenarios for day 13.2.2023, hours 16-24 UTC.**

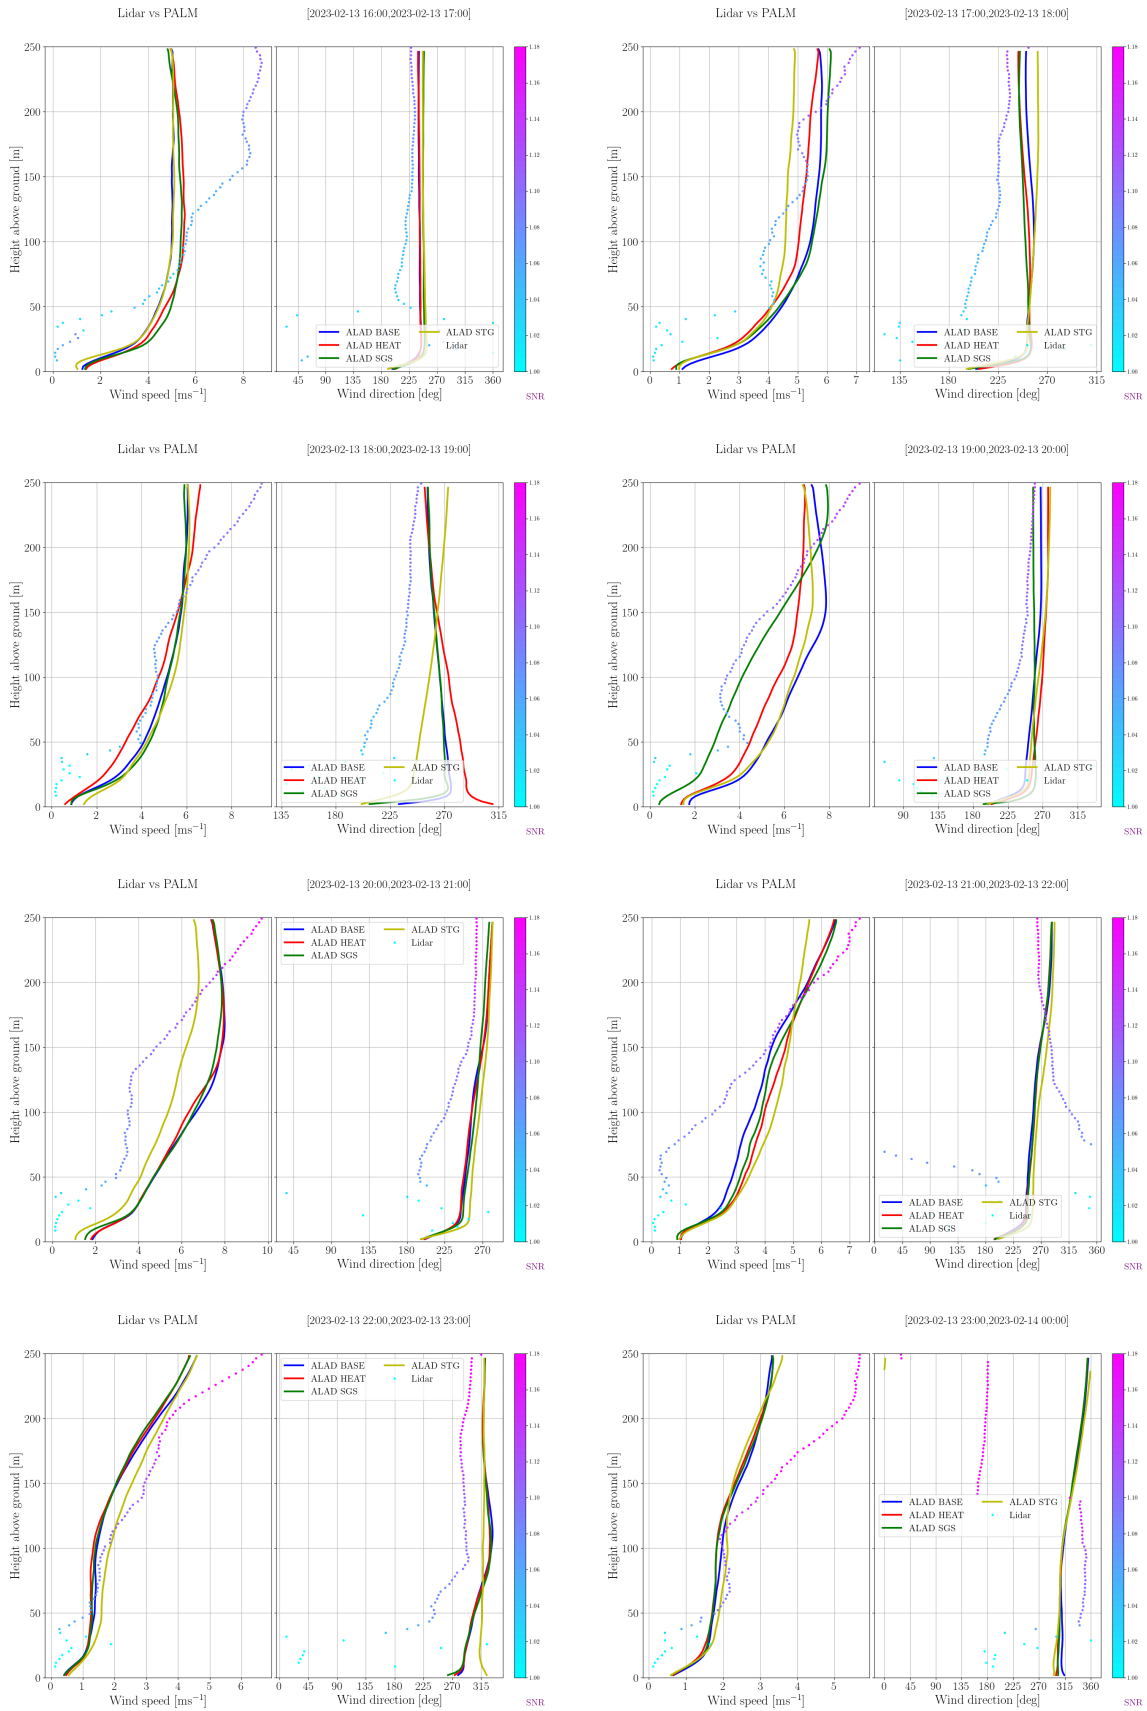

**Fig.S19: Comparison of the hourly averaged PALM modeled wind speed and wind direction with LIDAR observations (dotted line) for PALM-ALAD (blue) model, HEAT (red), SGS (green), and STG (yellow) scenarios for day 13.2.2023, hours 16-24 UTC.**

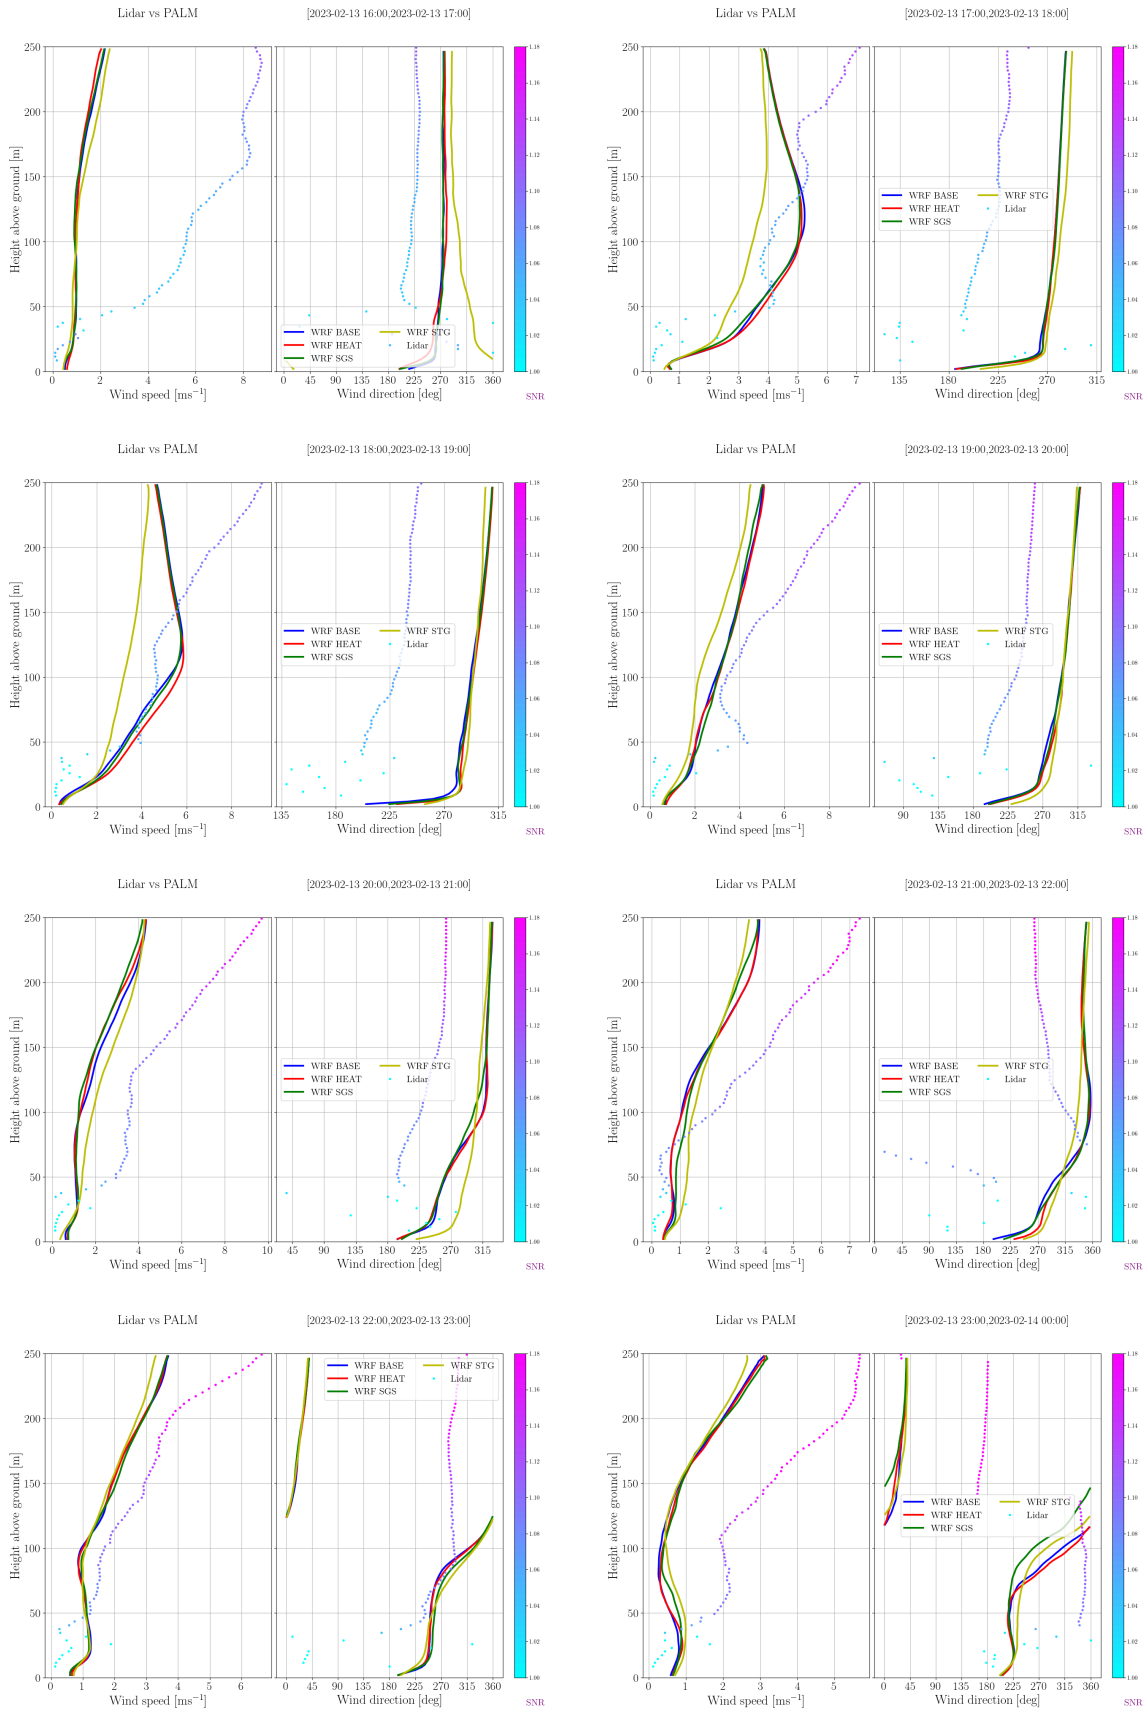

**Fig.S20: Comparison of the hourly averaged PALM modeled wind speed and wind direction with LIDAR observations (dotted line) for PALM-WRF (blue) model, HEAT (red), SGS (green), and STG (yellow) scenarios for day 13.2.2023, hours 16-24 UTC.**



## J. Domain cross-sections

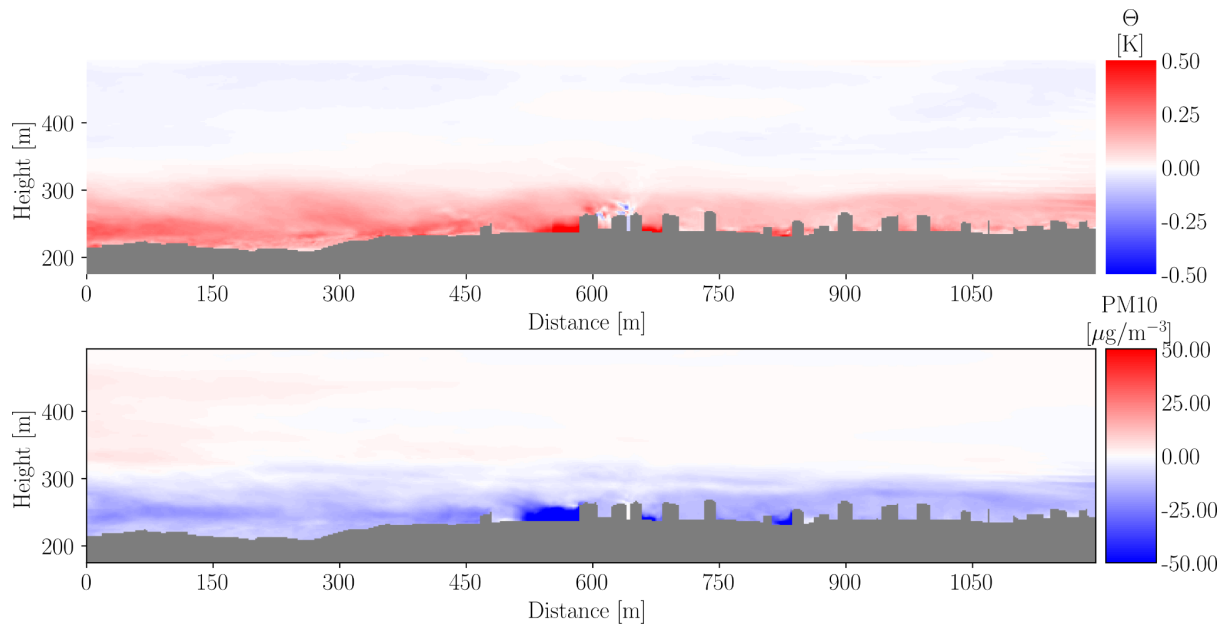

*Fig. 21: Difference of HEAT minus BASE scenarios for PALM-ICON model on 13 February 2023 at hour 18. The values of air temperature (upper) and concentration of PM10 (lower) on the cross-section through the child domain in the position of ALEGA station are shown.*
